# Supplementary material
Source: publisher figshare collection journal article supplement (https://gsajournals.figshare.com/articles/dataset/_/9026579)

## Supplementary Figures

### Figure S1 (related to Figure 1 and 2). Expression of Vasa transgenes.

- A) Schematic representation of transgenic constructs GFP-Vas<sup>WT</sup>, GFP-Vas<sup>DQAD</sup> and GFP-Vas<sup>GNT</sup>.
- B) Expression patterns of *vas-Gal4* (top) and *matTub-Gal4* (bottom). Upper panels show schematic representation of the stages at which each driver is expressed. Bottom panels show confocal images of ovarioles expressing GFP-Vas<sup>WT</sup> (GFP signal, green) under the control of each of the drivers. Scale bar indicates 50  $\mu$ m.
- C) Morphology of ovaries of wild-type (*w<sup>1118</sup>*) and *vas<sup>D1/D1</sup>* flies. Scale bar indicates 500  $\mu$ m.
- D) Western blot analysis using antibodies against Vasa showing protein levels in ovaries of wild-type (*w<sup>1118</sup>*), *vas<sup>PD/D1</sup>*, *vas<sup>PD/D1</sup>; vas-Gal4>GFP-Vas<sup>WT</sup>*, *vas<sup>PD/D1</sup>; vas-Gal4>GFP-Vas<sup>DQAD</sup>*, *vas<sup>PD/D1</sup>; vas-Gal4>GFP-Vas<sup>GNT</sup>*, *vas<sup>D1/D1</sup>*, *vas<sup>D1/D1</sup>; vas-Gal4>GFP-Vas<sup>WT</sup>*, *vas<sup>D1/D1</sup>; vas-Gal4>GFP-Vas<sup>DQAD</sup>* and *vas<sup>D1/D1</sup>; vas-Gal4>GFP-Vas<sup>GNT</sup>*. Tubulin served as a loading control.
- E) Western blot analysis using antibodies against Vasa showing protein levels in early embryos produced by wild-type (*w<sup>1118</sup>*), *vas<sup>PD/D1</sup>*, *vas<sup>PD/D1</sup>; vas-Gal4>GFP-Vas<sup>WT</sup>*, *vas<sup>PD/D1</sup>; vas-Gal4>GFP-Vas<sup>DQAD</sup>*, *vas<sup>PD/D1</sup>; vas-Gal4>GFP-Vas<sup>GNT</sup>* and *vas<sup>D1/D1</sup>; vas-Gal4>GFP-Vas<sup>WT</sup>* flies. Tubulin served as a loading control.

### Figure S2 (related to Figure 3). Localization of Aub and Ago3 in the egg-chamber.

- A) Immunodetection of Aub and Vasa in stage 6-8 egg-chambers from wild-type (*w<sup>1118</sup>*), *vas<sup>PD/D1</sup>*, *vas<sup>PD/D1</sup>; vas-Gal4>GFP-Vas<sup>WT</sup>*, *vas<sup>PD/D1</sup>; vas-Gal4>GFP-Vas<sup>DQAD</sup>* and *vas<sup>PD/D1</sup>; vas-Gal4>GFP-Vas<sup>GNT</sup>* flies. Scale bars indicate 50  $\mu$ m (egg-chamber) and 10  $\mu$ m (nuage).
- B) Immunodetection of Ago3 and Vasa in stage 6-8 egg-chambers from flies as in A. Scale bars indicate 50  $\mu$ m (egg-chamber) and 10  $\mu$ m (nuage).

C) Immunodetection of Aub and Vasa in stage 10 egg-chambers from wild-type ( $w^{1118}$ ),  $vas^{PD/D1}$ ,  $vas^{PD/D1}; vas-Gal4>GFP-Vas^{WT}$  and  $vas^{PD/D1}; vas-Gal4>GFP-Vas^{GNT}$  flies. Scale bars indicate 100  $\mu$ m (egg-chamber) and 10  $\mu$ m (posterior pole).

D) Immunodetection of Ago3 and Vasa in stage 10 egg-chambers from flies as in D. Scale bars indicate 100  $\mu$ m (egg-chamber) and 10  $\mu$ m (posterior pole).

**Figure S3 (related to Figure 3). Localization of Aub and Ago3 in the egg-chamber and embryos.**

A) Immunodetection of Aub and Vasa (upper panels) and Ago3 and Vasa (bottom panels) in stage 6-8 egg-chambers from  $vas^{D1/D1}; vas-Gal4>GFP-Vas^{WT}$  flies. Scale bars indicate 50  $\mu$ m (egg-chamber) and 10  $\mu$ m (nuage).

B) Immunodetection of Aub and Vasa (upper panels) and Ago3 and Vasa (bottom panels) in stage 10 egg-chambers from  $vas^{D1/D1}; vas-Gal4>GFP-Vas^{WT}$  flies. Scale bars indicate 100  $\mu$ m (egg-chamber) and 10  $\mu$ m (posterior pole).

C) Immunodetection of Aub and Vasa in early embryos (stage 1) produced by wild-type ( $w^{1118}$ ),  $vas^{PD/D1}$ ,  $vas^{PD/D1}; vas-Gal4>GFP-Vas^{WT}$ ,  $vas^{PD/D1}; vas-Gal4>GFP-Vas^{GNT}$  and  $vas^{D1/D1}; vas-Gal4>GFP-Vas^{WT}$  flies. Scale bars indicate 100  $\mu$ m (embryo) and 20  $\mu$ m (posterior pole).

D) Immunodetection of Ago3 and Vasa in early embryos (stage 1) produced by flies as in C. Scale bars indicate 100  $\mu$ m (embryo) and 20  $\mu$ m (posterior pole).

**Figure S4 (related to Figure 4). GFP-Vasa co-immunoprecipitation analyses.**

A) Correlation analysis of two replicates of GFP-Vas<sup>WT</sup> and GFP-Vas<sup>DQAD</sup> co-IPs (co-IP1, left chart; co-IP2, right chart). Correlation was determined using Pearson's correlation coefficient calculation.

B) Venn diagrams comparing two biological replicates (co-IP1, blue circle; co-IP2, red circle) of GFP-Vas<sup>WT</sup> (left) and GFP-Vas<sup>DQAD</sup> (right) co-IPs.

C) Venn diagram of enriched (>2 fold) proteins represented in Figure 3C from two biological

replicates of GFP-Vas<sup>WT</sup> and GFP-Vas<sup>DQAD</sup> co-IPs.

D) Gene Ontology enrichment analysis of biological processes for genes enriched in GFP-Vas<sup>WT</sup> and GFP-Vas<sup>DQAD</sup> co-IPs.

E) Gene Ontology enrichment analysis of cellular component for genes enriched in GFP-Vas<sup>WT</sup> and GFP-Vas<sup>DQAD</sup> co-IPs.

**Figure S5 (related to Figure 5). Age-dependent progression of ovarian atrophy.**

A) Images of ovaries from 3-day, 10-day, and 20-day old wild-type (*w<sup>1118</sup>*), *vas<sup>D1/D1</sup>*, *vas<sup>D1/D1</sup>*; *vas-Gal4>GFP-Vas<sup>WT</sup>* and *vas<sup>D1/D1</sup>*; *matTub-Gal4>GFP-Vas<sup>WT</sup>* flies. Scale bar indicates 500  $\mu$ m.

B) Confocal images of ovarioles from 3-day, 10-day, and 20-day old wild-type (*w<sup>1118</sup>*), *vas<sup>D1/D1</sup>*, *vas<sup>D1/D1</sup>*; *vas-Gal4>GFP-Vas<sup>WT</sup>* and *vas<sup>D1/D1</sup>*; *matTub-Gal4>GFP-Vas<sup>WT</sup>* flies. Pyknotic egg-chambers are marked with asterisk. Scale bar indicates 100  $\mu$ m.

**Figure S6 (related to Figure 6). Control of *mnk* RNAi efficiency.**

A) Q-PCR analysis of *mnk* mRNA in ovaries from wild-type (*w<sup>1118</sup>*), *vas<sup>D1/D1</sup>*, *vas<sup>D1/D1</sup>*; *vas-Gal4>TRiPmnk*, *vas<sup>D1/D1</sup>*; *matTub-Gal4>TRiPmnk* and *vas<sup>D1/D1</sup>*; *vas-Gal4>TRiPw* flies. Expression level of *mnk* in *w<sup>1118</sup>* was set to 1 and normalized to *rp49* mRNA in individual experiments. Error bars represent the standard deviation among three biological replicates.

B) Images of ovaries (left) and *in situ* detection of *mnk* mRNA by FISH (right), in wild-type (*w<sup>1118</sup>*), *vas<sup>D1/D1</sup>*, *vas<sup>D1/D1</sup>*; *vas-Gal4>TRiPmnk*, *vas<sup>D1/D1</sup>*; *matTub-Gal4>TRiPmnk* and *vas<sup>D1/D1</sup>*; *vas-Gal4>TRiPw* ovaries. Scale bars indicate 500  $\mu$ m (ovaries) and 100  $\mu$ m (ovarioles).

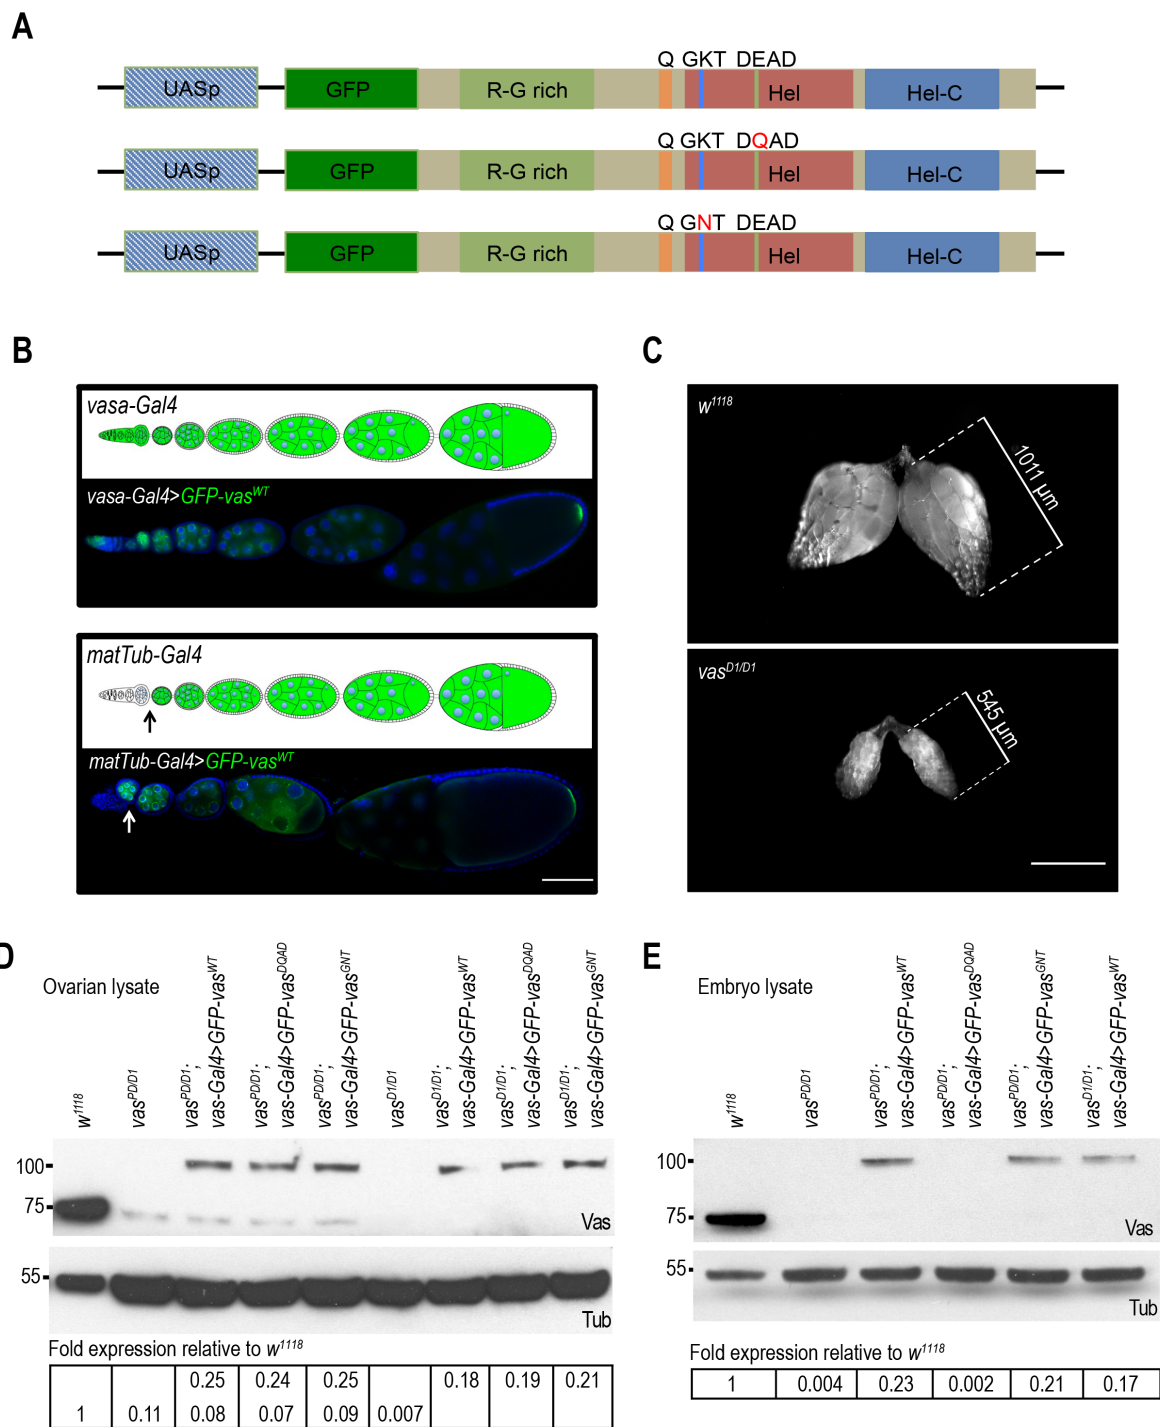

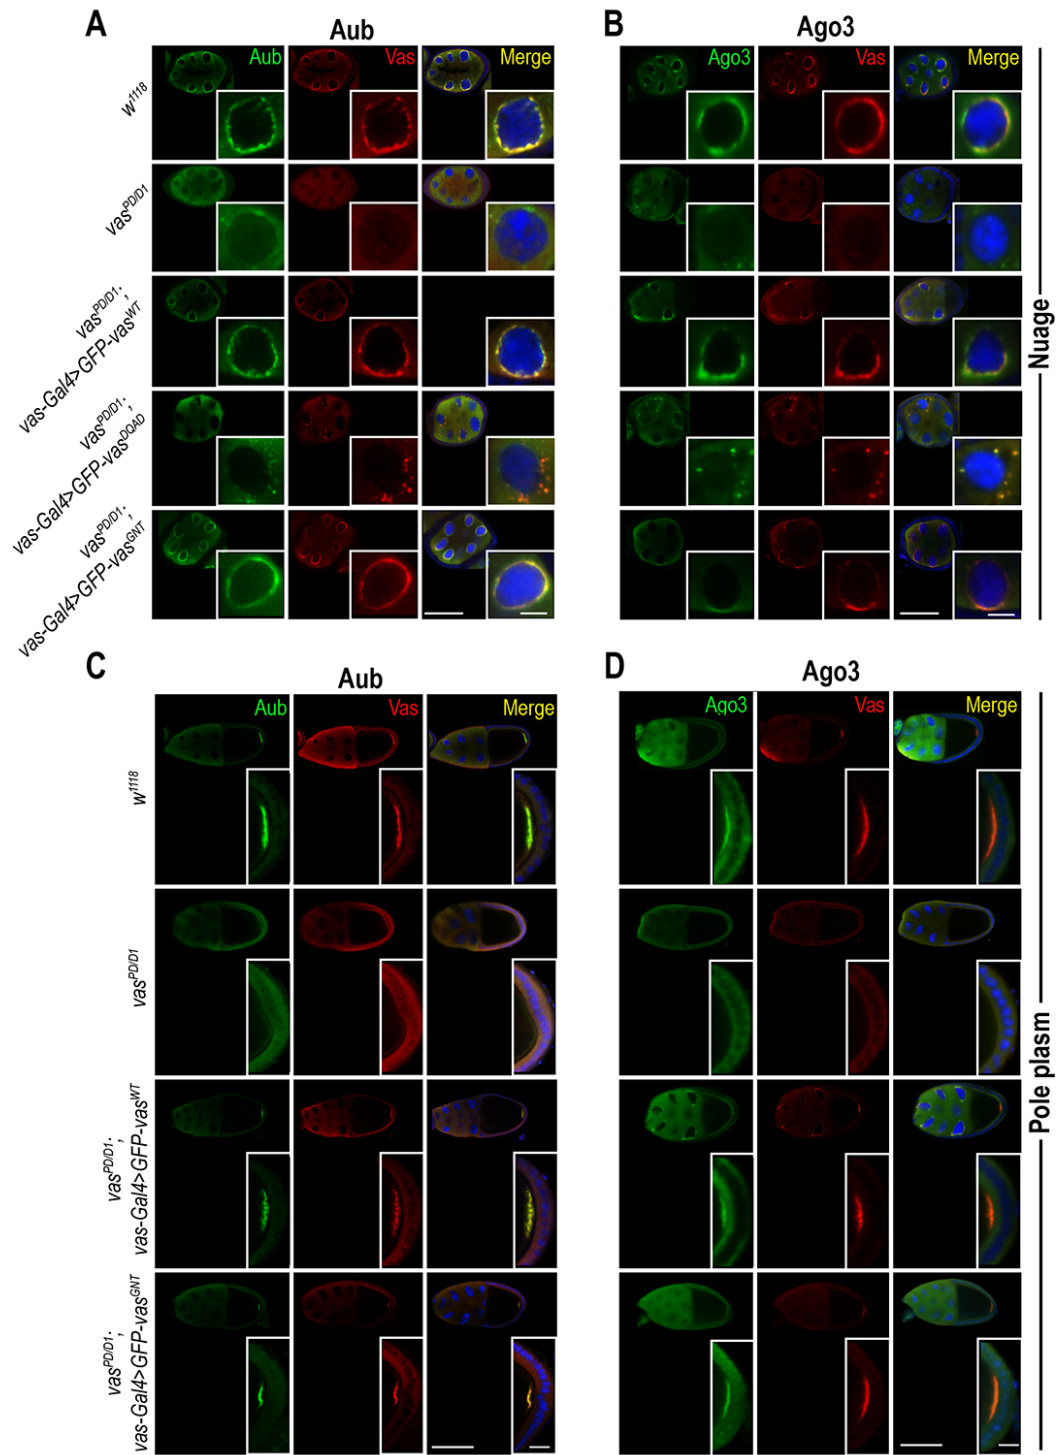

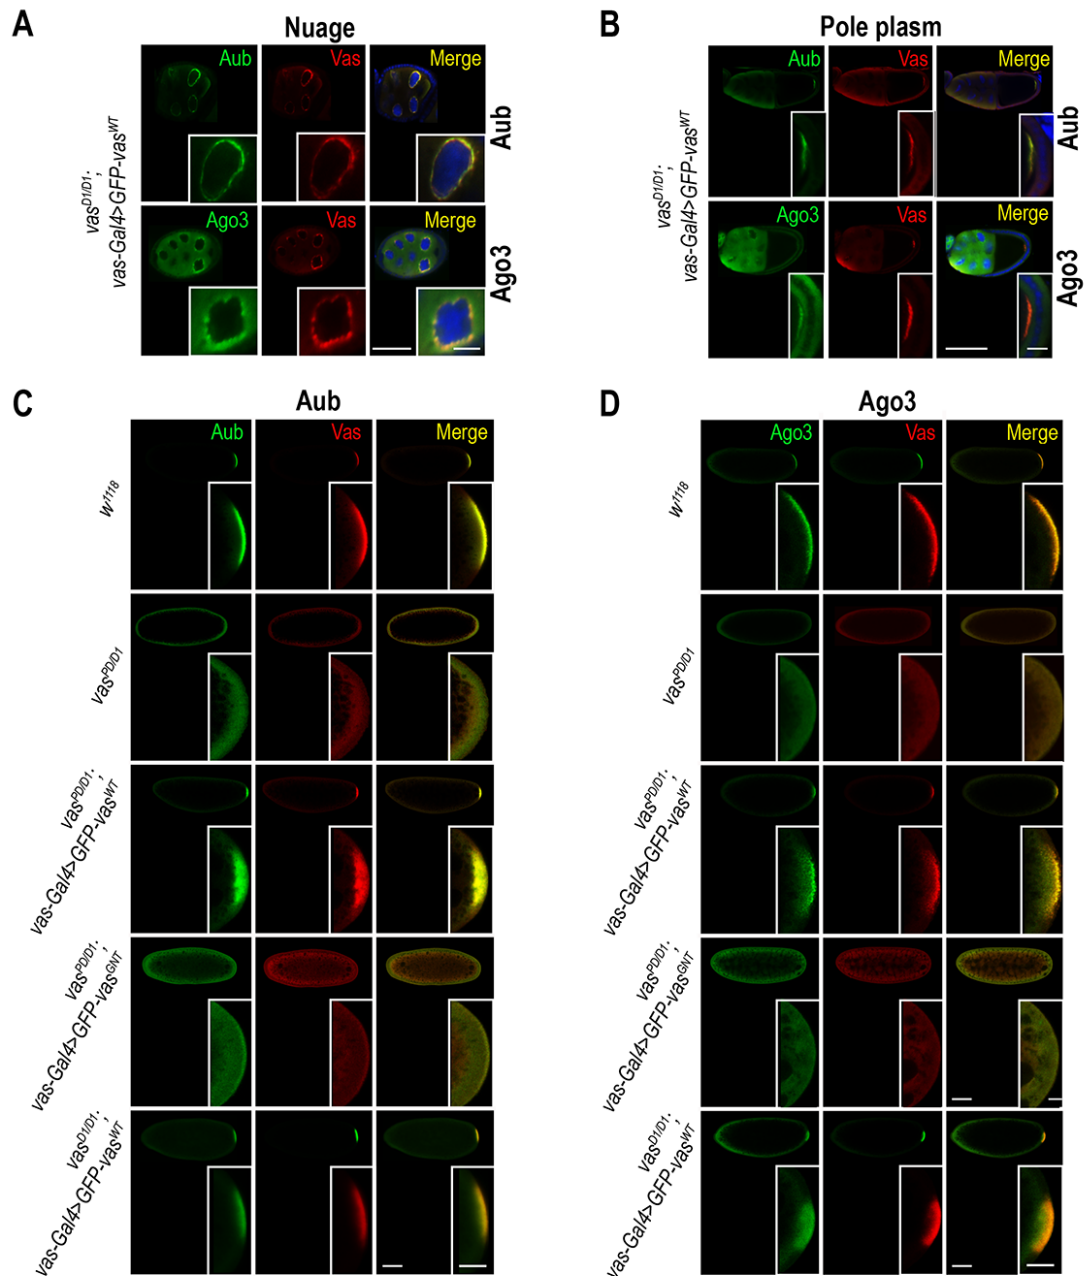

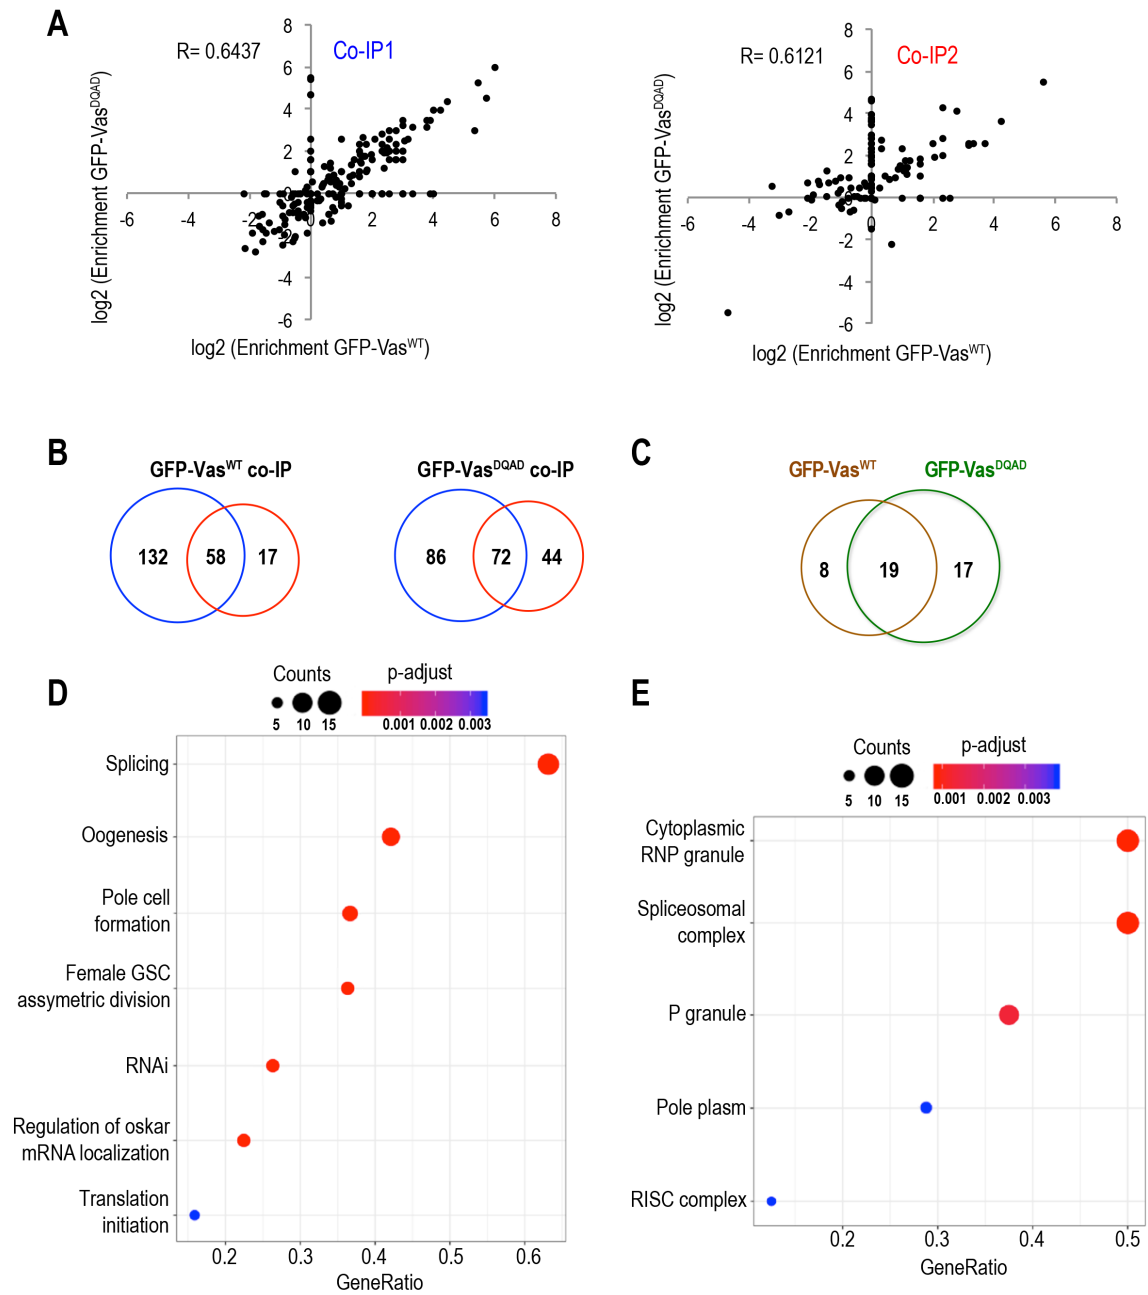

**A**

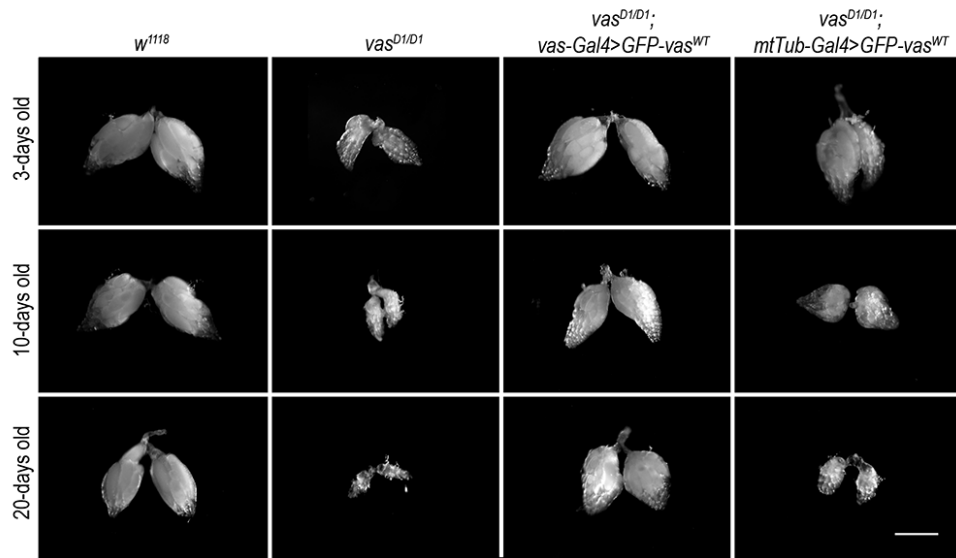

**B**

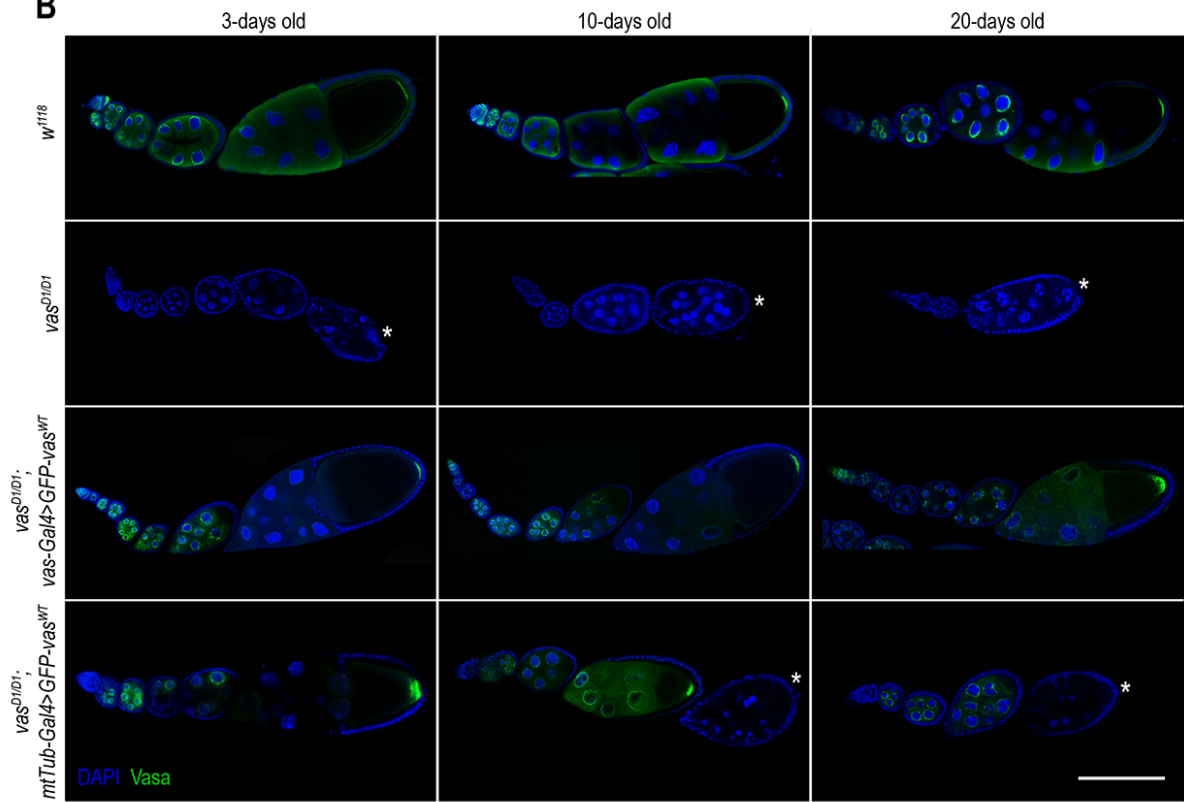



**A**

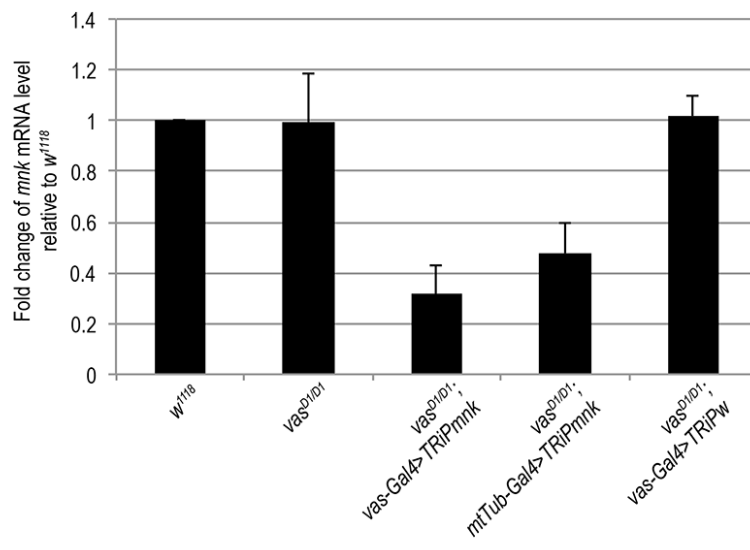

**B**

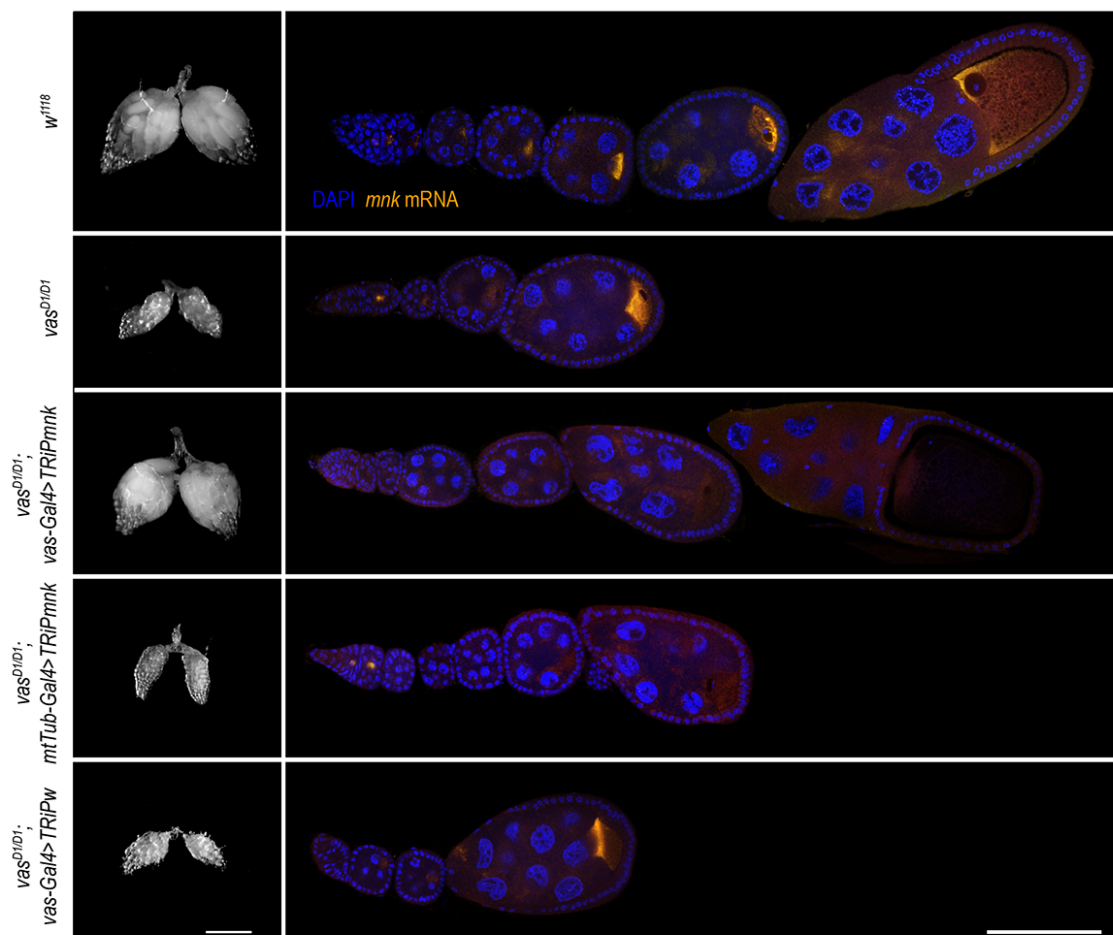

Supplement: Supplementary file 1 [file 1]
