# Supplementary material
Source: publisher figshare collection journal article supplement (https://gsajournals.figshare.com/articles/dataset/_/9026579)
Supplement: Supplementary file 1 [file 1]

## Sheet: IP1-Unwighted_spectrum_count
#	Identified Proteins	Accession Number	Molecular Weight	Protein Grouping Ambiguity	GFP-Vasa WT	GFP-Vasa E400Q	CTRL GFP
1	Zipper, isoform D OS=Drosophila melanogaster GN=zip PE=4 SV=1	Q59E59_DROME	232 kDa	TRUE	1701	1613	1323
2	rRNA 2'-O-methyltransferase fibrillarin OS=Drosophila melanogaster GN=Fib PE=2 SV=1	FBRL_DROME	35 kDa		319	267	519
3	BcDNA.GH11110 OS=Drosophila melanogaster GN=nito PE=2 SV=1	Q7KMJ6_DROME	89 kDa		413	391	264
4	Actin-5C OS=Drosophila melanogaster GN=Act5C PE=1 SV=4	ACT1_DROME	42 kDa	TRUE	577	417	321
5	Nucleolar protein at 60B, isoform C OS=Drosophila melanogaster GN=Nop60B PE=4 SV=1	E1JGV6_DROME (+1)	57 kDa		261	299	32
6	Zeljko_GFP_Vasa_WT	sp|Zeljko_GFP_Vasa_WT|	99 kDa		321	307	5
7	Probable H/ACA ribonucleoprotein complex subunit 1 OS=Drosophila melanogaster GN=CG4038 PE=1 SV=1	GAR1_DROME	23 kDa		99	123	112
8	40S ribosomal protein S2 OS=Drosophila melanogaster GN=RpS2 PE=1 SV=2	RS2_DROME	29 kDa		102	76	136
9	40S ribosomal protein S8 OS=Drosophila melanogaster GN=RpS8 PE=1 SV=1	RS8_DROME	24 kDa		74	76	107
10	Karst, isoform E OS=Drosophila melanogaster GN=kst PE=4 SV=2	A8JNJ6_DROME (+1)	498 kDa		174	64	86
11	CG8929, isoform A OS=Drosophila melanogaster GN=CG8929 PE=2 SV=1	Q960E4_DROME	68 kDa		78	104	121
12	Protein virilizer OS=Drosophila melanogaster GN=vir PE=1 SV=1	VIR_DROME	209 kDa		66	58	37
13	Isoform H of Myosin heavy chain 95F OS=Drosophila melanogaster GN=jar	sp|Q01989-2|MYS9_DROME (+1)	145 kDa		94	103	56
14	Isoform D of Titin OS=Drosophila melanogaster GN=sls	sp|Q9I7U4-4|TITIN_DROME (+3)	1849 kDa		116	80	100
15	CG3689, isoform C OS=Drosophila melanogaster GN=CG3689 PE=4 SV=1	Q0E8G6_DROME	27 kDa		53	46	17
16	Elongation factor 1-alpha 1 OS=Drosophila melanogaster GN=Ef1alpha48D PE=1 SV=2	EF1A1_DROME	50 kDa		63	37	73
17	Dilute class unconventional myosin, isoform C OS=Drosophila melanogaster GN=didum PE=4 SV=1	A1Z6Z8_DROME (+1)	208 kDa		99	71	41
18	Ribosomal protein S3A, isoform F OS=Drosophila melanogaster GN=RpS3A PE=4 SV=1	H9XVL9_DROME (+1)	30 kDa		46	30	83
19	60S ribosomal protein L10 OS=Drosophila melanogaster GN=RpL10 PE=2 SV=1	RL10_DROME	26 kDa		41	30	73
20	ATP-dependent RNA helicase abstrakt OS=Drosophila melanogaster GN=abs PE=1 SV=1	DDX41_DROME	69 kDa		44	75	32
21	H/ACA ribonucleoprotein complex subunit 2-like protein OS=Drosophila melanogaster GN=NHP2 PE=1 SV=1	NHP2_DROME	18 kDa		53	37	53
22	FI04781p OS=Drosophila melanogaster GN=Nop56 PE=2 SV=1	Q95WY3_DROME	55 kDa		51	71	12
23	Spectrin alpha chain OS=Drosophila melanogaster GN=alpha-Spec PE=1 SV=2	SPTCA_DROME	278 kDa		93	49	43
24	Heat shock 70 kDa protein cognate 4 OS=Drosophila melanogaster GN=Hsc70-4 PE=1 SV=3	HSP7D_DROME	71 kDa	TRUE	74	48	39
25	40S ribosomal protein S4 OS=Drosophila melanogaster GN=RpS4 PE=2 SV=2	RS4_DROME	29 kDa		47	16	66
26	Rm62, isoform H OS=Drosophila melanogaster GN=Rm62 PE=3 SV=1	E1JJ68_DROME (+4)	62 kDa	TRUE	26	49	8
27	CG10206-PA OS=Drosophila melanogaster GN=nop5 PE=2 SV=2	Q9VM69_DROME	57 kDa		49	56	16
28	H/ACA ribonucleoprotein complex subunit 3 OS=Drosophila melanogaster GN=CG7637 PE=1 SV=1	NOP10_DROME	8 kDa		40	23	53
29	FI01658p OS=Drosophila melanogaster GN=RpL23A PE=2 SV=1	Q9W0A8_DROME	29 kDa		45	22	50
30	40S ribosomal protein S14 OS=Drosophila melanogaster GN=RpS14a PE=1 SV=1	RS14_DROME	16 kDa		33	22	44
31	ATP-dependent RNA helicase bel OS=Drosophila melanogaster GN=bel PE=1 SV=1	DDX3_DROME	85 kDa		55	50	14
32	Vitellogenin-3 OS=Drosophila melanogaster GN=Yp3 PE=1 SV=1	VIT3_DROME	46 kDa		43	45	13
33	U1 small nuclear ribonucleoprotein 70 kDa OS=Drosophila melanogaster GN=snRNP-U1-70K PE=1 SV=2	RU17_DROME	53 kDa		48	46	3
34	Tubulin beta-1 chain OS=Drosophila melanogaster GN=betaTub56D PE=1 SV=2	TBB1_DROME	50 kDa		37	35	12
35	40S ribosomal protein S3 OS=Drosophila melanogaster GN=RpS3 PE=1 SV=1	RS3_DROME	27 kDa		45	13	34
36	40S ribosomal protein S11 OS=Drosophila melanogaster GN=RpS11 PE=1 SV=1	RS11_DROME	18 kDa		24	15	49
37	Isoform 1 of Myosin heavy chain, non-muscle OS=Drosophila melanogaster GN=zip	sp|Q99323-1|MYSN_DROME (+1)	232 kDa	TRUE	1654	1575	1252
38	Isoform A of ADP,ATP carrier protein OS=Drosophila melanogaster GN=sesB	sp|Q26365-2|ADT_DROME	33 kDa		27	9	51
39	60S ribosomal protein L23 OS=Drosophila melanogaster GN=RpL23 PE=2 SV=2	RL23_DROME	15 kDa		26	21	39
40	Isoform D of Myosin heavy chain, muscle OS=Drosophila melanogaster GN=Mhc	sp|P05661-17|MYSA_DROME (+1)	224 kDa		44	37
41	40S ribosomal protein S23 OS=Drosophila melanogaster GN=RpS23 PE=2 SV=1	RS23_DROME	16 kDa		17	15	50
42	Actin-57B OS=Drosophila melanogaster GN=Act57B PE=1 SV=1	ACT3_DROME (+1)	42 kDa	TRUE	350	249	182
43	60S ribosomal protein L3 OS=Drosophila melanogaster GN=RpL3 PE=2 SV=3	sp|O16797|RL3_DROME	47 kDa		16	15	41
44	Polyadenylate-binding protein OS=Drosophila melanogaster GN=pAbp PE=1 SV=3	PABP_DROME	70 kDa		32	44	4
45	Myosin-VIIa OS=Drosophila melanogaster GN=ck PE=1 SV=1	MYO7A_DROME	250 kDa		53	23
46	Isoform B of Pyruvate kinase OS=Drosophila melanogaster GN=PyK	sp|O62619-2|KPYK_DROME (+1)	55 kDa		39	26	7
47	IP17351p OS=Drosophila melanogaster GN=RpL36A PE=2 SV=2	Q9VLT7_DROME	13 kDa		11	12	35
48	Cleavage and polyadenylation specificity factor subunit CG7185 OS=Drosophila melanogaster GN=CG7185 PE=1 SV=2	CPSF6_DROME	71 kDa		22	23	15
49	EF-hand domain-containing protein CG10641 OS=Drosophila melanogaster GN=CG10641 PE=2 SV=1	EFHD_DROME	25 kDa		41	16	25
50	Actin, larval muscle OS=Drosophila melanogaster GN=Act79B PE=1 SV=2	ACT4_DROME	42 kDa	TRUE	291	198	112
51	Small nuclear ribonucleoprotein-associated protein B OS=Drosophila melanogaster GN=SmB PE=1 SV=1	RSMB_DROME	21 kDa		20	11	8
52	40S ribosomal protein S7 OS=Drosophila melanogaster GN=RpS7 PE=2 SV=1	RS7_DROME	22 kDa		20	6	30
53	60S ribosomal protein L22 OS=Drosophila melanogaster GN=RpL22 PE=1 SV=2	RL22_DROME	31 kDa		22	14	18
54	Isoform 3 of Gelsolin OS=Drosophila melanogaster GN=Gel	sp|Q07171-3|GELS_DROME (+1)	98 kDa		37	18	21
55	60S ribosomal protein L27a OS=Drosophila melanogaster GN=RpL27A PE=2 SV=2	RL27A_DROME	17 kDa		14	9	32
56	F-actin-capping protein subunit beta OS=Drosophila melanogaster GN=cpb PE=2 SV=1	CAPZB_DROME	31 kDa		34	15	5
57	Alpha-Tubulin at 84D, isoform B OS=Drosophila melanogaster GN=alphaTub84D PE=3 SV=1	A4V2J2_DROME (+2)	50 kDa		28	22	5
58	40S ribosomal protein S16 OS=Drosophila melanogaster GN=RpS16 PE=2 SV=1	RS16_DROME	17 kDa		12	7	35
59	ATP synthase subunit alpha, mitochondrial OS=Drosophila melanogaster GN=blw PE=1 SV=2	ATPA_DROME	59 kDa		25	17	3
60	Pre-mRNA-splicing regulator female-lethal(2)D OS=Drosophila melanogaster GN=fl(2)d PE=1 SV=2	sp|Q9Y091|FL2D_DROME	59 kDa		17	18	11
61	F-actin-capping protein subunit alpha OS=Drosophila melanogaster GN=cpa PE=2 SV=1	CAPZA_DROME	33 kDa		41	8
62	40S ribosomal protein S26 OS=Drosophila melanogaster GN=RpS26 PE=1 SV=1	RS26_DROME	13 kDa		8	12	26
63	AUBERGINE OS=Drosophila melanogaster GN=aub PE=1 SV=1	O76922_DROME	99 kDa			45
64	RE28824p OS=Drosophila melanogaster GN=RpL12 PE=2 SV=1	Q9W1B9_DROME	18 kDa		15	12	16
65	Serine/threonine-protein kinase PITSLRE OS=Drosophila melanogaster GN=Pitslre PE=1 SV=1	KP58_DROME	109 kDa		14	20	9
66	CG12075, isoform A OS=Drosophila melanogaster GN=CG12075-RB PE=2 SV=3	Q9W3B8_DROME	114 kDa		14	24	9
67	Ribosomal protein S15Aa, isoform F OS=Drosophila melanogaster GN=RpS15Aa PE=3 SV=1	E1JJM9_DROME (+1)	15 kDa		7	5	31
68	Myosin-IA OS=Drosophila melanogaster GN=Myo31DF PE=2 SV=1	MY31D_DROME	117 kDa		22	20
69	Isoform B of Probable RNA helicase armi OS=Drosophila melanogaster GN=armi	sp|Q6J5K9-2|ARMI_DROME (+1)	136 kDa			42
70	Probable small nuclear ribonucleoprotein Sm D2 OS=Drosophila melanogaster GN=SmD2 PE=3 SV=1	SMD2_DROME	14 kDa		16	11	3
71	Isoform C of Fragile X mental retardation syndrome-related protein 1 OS=Drosophila melanogaster GN=Fmr1	sp|Q9NFU0-2|FMR1_DROME (+1)	76 kDa			25
72	CG12581, isoform A OS=Drosophila melanogaster GN=CG12581-RA PE=2 SV=2	Q9VMY3_DROME	71 kDa		11	15	12
73	40S ribosomal protein S6 OS=Drosophila melanogaster GN=RpS6 PE=1 SV=1	sp|P29327|RS6_DROME	28 kDa		11	5	20
74	NHP2-like protein 1 homolog OS=Drosophila melanogaster GN=hoip PE=2 SV=1	NH2L1_DROME	14 kDa		9	11	17
75	Isoform B of Putative ATP-dependent RNA helicase me31b OS=Drosophila melanogaster GN=me31B	sp|P23128-2|DDX6_DROME (+1)	49 kDa		28	21	5
76	60S ribosomal protein L5 OS=Drosophila melanogaster GN=RpL5 PE=2 SV=2	RL5_DROME	34 kDa		19	6	11
77	Histone H2B OS=Drosophila melanogaster GN=His2B PE=1 SV=2	H2B_DROME	14 kDa		9	8	17
78	CG7358 OS=Drosophila melanogaster GN=CG7358 PE=2 SV=1	Q9VWN4_DROME	129 kDa		15	10	13
79	Protein cup OS=Drosophila melanogaster GN=cup PE=1 SV=3	CUP_DROME	126 kDa		19	15
80	60S ribosomal protein L11 OS=Drosophila melanogaster GN=RpL11 PE=1 SV=2	RL11_DROME	21 kDa		14	4	15
81	Eukaryotic initiation factor 4A OS=Drosophila melanogaster GN=eIF-4a PE=2 SV=3	IF4A_DROME	46 kDa		11	8	2
82	Ubiquitin-40S ribosomal protein S27a OS=Drosophila melanogaster GN=RpS27A PE=1 SV=2	RS27A_DROME	18 kDa	TRUE	7		19
83	Small nuclear ribonucleoprotein Sm D3 OS=Drosophila melanogaster GN=SmD3 PE=1 SV=1	SMD3_DROME	16 kDa			7	11
84	T-complex protein 1 subunit alpha OS=Drosophila melanogaster GN=T-cp1 PE=3 SV=1	A4V391_DROME (+1)	60 kDa		18	11	5
85	60S ribosomal protein L17 OS=Drosophila melanogaster GN=RpL17 PE=1 SV=1	RL17_DROME	22 kDa		6		17
86	Probable small nuclear ribonucleoprotein E OS=Drosophila melanogaster GN=SmE PE=3 SV=1	RUXE_DROME	11 kDa		20	20	8
87	40S ribosomal protein S25 OS=Drosophila melanogaster GN=RpS25 PE=1 SV=3	RS25_DROME	13 kDa		6	3	21
88	Darkener of apricot, isoform N OS=Drosophila melanogaster GN=Doa PE=4 SV=1	A4V3J9_DROME (+6)	68 kDa		7	20	10
89	26-29kD-proteinase OS=Drosophila melanogaster GN=26-29-p PE=2 SV=1	Q9V3U6_DROME	62 kDa		12	4	8
90	Tubulin alpha-4 chain OS=Drosophila melanogaster GN=alphaTub67C PE=3 SV=1	TBA4_DROME	51 kDa		15	11
91	Actin-42A OS=Drosophila melanogaster GN=Act42A PE=1 SV=3	ACT2_DROME	42 kDa	TRUE	216	306	206
92	CG3056, isoform A OS=Drosophila melanogaster GN=ssx PE=2 SV=1	O76876_DROME (+1)	53 kDa		10	9
93	Spectrin beta chain OS=Drosophila melanogaster GN=beta-Spec PE=1 SV=2	SPTCB_DROME	266 kDa		15	10	12
94	Heat shock protein 83 OS=Drosophila melanogaster GN=Hsp83 PE=1 SV=1	HSP83_DROME	82 kDa		15	10	16
95	40S ribosomal protein S27 OS=Drosophila melanogaster GN=RpS27 PE=2 SV=1	Q9VBU9_DROME	9 kDa		7		14
96	Ribosomal protein S15, isoform B OS=Drosophila melanogaster GN=RpS15 PE=2 SV=1	A1ZAH8_DROME (+1)	17 kDa				6
97	60S ribosomal protein L18 OS=Drosophila melanogaster GN=RpL18 PE=1 SV=1	RL18_DROME	22 kDa		4	4	15
98	Ribosomal protein L6, isoform A OS=Drosophila melanogaster GN=RpL6 PE=2 SV=1	Q9V9W2_DROME (+1)	28 kDa		9	6	9
99	40S ribosomal protein S9 OS=Drosophila melanogaster GN=RpS9 PE=2 SV=2	RS9_DROME	23 kDa		6		17
100	UPF0428 protein CG16865 OS=Drosophila melanogaster GN=CG16865 PE=1 SV=1	U428_DROME	28 kDa		12	5	6
101	Isoform B of Eukaryotic translation initiation factor 3 subunit A OS=Drosophila melanogaster GN=eIF3-S10	sp|Q9VN25-2|EIF3A_DROME (+1)	126 kDa		16	7	3
102	Vitellogenin-1 OS=Drosophila melanogaster GN=Yp1 PE=1 SV=1	VIT1_DROME	49 kDa	TRUE	14	11
103	RE17611p OS=Drosophila melanogaster GN=RpL26 PE=2 SV=1	Q9VVU2_DROME	17 kDa		11		12
104	Eukaryotic translation initiation factor 4G, isoform B OS=Drosophila melanogaster GN=eIF4G PE=4 SV=1	A8DZ29_DROME (+1)	211 kDa		14	9
105	60S ribosomal protein L18a OS=Drosophila melanogaster GN=RpL18A PE=1 SV=1	RL18A_DROME	21 kDa		8		10
106	Histone H2A.v OS=Drosophila melanogaster GN=His2Av PE=1 SV=2	H2AV_DROME	15 kDa		6	6	8
107	60S ribosomal protein L8 OS=Drosophila melanogaster GN=RpL8 PE=2 SV=1	RL8_DROME	28 kDa		9	3	13
108	Histone H3 OS=Drosophila melanogaster GN=His3.3A PE=3 SV=1	E2QCP0_DROME (+2)	14 kDa				19
109	Guanine nucleotide-binding protein subunit beta-like protein OS=Drosophila melanogaster GN=Rack1 PE=2 SV=2	GBLP_DROME	36 kDa		7	4	2
110	Ran, isoform B OS=Drosophila melanogaster GN=ran PE=4 SV=1	A4V4A5_DROME (+1)	25 kDa		6		11
111	Heat shock 70 kDa protein cognate 3 OS=Drosophila melanogaster GN=Hsc70-3 PE=2 SV=2	HSP7C_DROME	72 kDa	TRUE	22	19	19
112	CG1622 OS=Drosophila melanogaster GN=CG1622-RA PE=2 SV=1	Q9VYE9_DROME	45 kDa		8	9	3
113	Probable small nuclear ribonucleoprotein G OS=Drosophila melanogaster GN=SmG PE=3 SV=1	RUXG_DROME	9 kDa		17	17	5
114	60S ribosomal protein L24 OS=Drosophila melanogaster GN=RpL24 PE=1 SV=1	RL24_DROME	18 kDa		4	3	11
115	Eukaryotic translation initiation factor 3 subunit D-1 OS=Drosophila melanogaster GN=eIF-3p66 PE=1 SV=1	EI3D1_DROME	64 kDa		7	10	2
116	Ribosome production factor 2 homolog OS=Drosophila melanogaster GN=CG7993 PE=2 SV=3	RPF2_DROME	36 kDa			9	9
117	Myosin-2 essential light chain OS=Drosophila melanogaster GN=Mlc-c PE=1 SV=1	MLC2_DROME	17 kDa		9	5	3
118	60S ribosomal protein L31 OS=Drosophila melanogaster GN=RpL31 PE=1 SV=1	RL31_DROME	15 kDa		7		10
119	MIP15344p OS=Drosophila melanogaster GN=RpL28 PE=2 SV=1	D1Z3A1_DROME (+1)	16 kDa		16
120	Isoform A of Cathepsin L OS=Drosophila melanogaster GN=Cp1	sp|Q95029-2|CATL_DROME (+1)	38 kDa		8	2	5
121	60S ribosomal protein L37a OS=Drosophila melanogaster GN=RpL37A PE=1 SV=3	RL37A_DROME	10 kDa		6		9
122	Short stop, isoform G OS=Drosophila melanogaster GN=shot PE=4 SV=1	A1Z9I8_DROME (+14)	615 kDa		7	8
123	Protein hu-li tai shao OS=Drosophila melanogaster GN=hts PE=1 SV=2	sp|Q02645|HTS_DROME	128 kDa		9	6
124	ATP synthase subunit beta, mitochondrial OS=Drosophila melanogaster GN=ATPsyn-beta PE=2 SV=3	ATPB_DROME	54 kDa		6	7	4
125	CG10077, isoform A OS=Drosophila melanogaster GN=CG10077 PE=2 SV=1	Q8MZI3_DROME	88 kDa	TRUE	6	8
126	Cctgamma, isoform B OS=Drosophila melanogaster GN=Cctgamma PE=3 SV=1	A4V303_DROME (+1)	59 kDa		10
127	eIF3-S9, isoform B OS=Drosophila melanogaster GN=eIF3-S9 PE=3 SV=1	E2QCG7_DROME (+1)	80 kDa		8	4
128	CG10263, isoform C OS=Drosophila melanogaster GN=Hakai PE=2 SV=1	Q8INV9_DROME (+1)	33 kDa		7	5
129	BcDNA.LD23634 OS=Drosophila melanogaster GN=BcDNA.LD23634 PE=2 SV=1	Q9V3Y5_DROME	113 kDa		6	6
130	Probable 60S ribosomal protein L37-A OS=Drosophila melanogaster GN=RpL37a PE=3 SV=1	RL371_DROME	11 kDa			4	7
131	Ecdysone-induced protein 63E, isoform G OS=Drosophila melanogaster GN=Eip63E PE=2 SV=1	Q7KM03_DROME (+4)	60 kDa		5	7
132	Probable small nuclear ribonucleoprotein Sm D1 OS=Drosophila melanogaster GN=SmD1 PE=1 SV=1	SMD1_DROME	14 kDa				9
133	Histone H4 OS=Drosophila melanogaster GN=His4 PE=1 SV=2	H4_DROME	11 kDa				12
134	Voltage-dependent anion-selective channel OS=Drosophila melanogaster GN=porin PE=1 SV=3	VDAC_DROME	31 kDa		7	2	3
135	40S ribosomal protein S17 OS=Drosophila melanogaster GN=RpS17 PE=2 SV=2	RS17_DROME	15 kDa		5		5
136	60S ribosomal protein L19 OS=Drosophila melanogaster GN=RpL19 PE=1 SV=2	RL19_DROME	24 kDa		6		6
137	40S ribosomal protein S20 OS=Drosophila melanogaster GN=RpS20 PE=1 SV=1	RS20_DROME	13 kDa				10
138	60S ribosomal protein L10a-2 OS=Drosophila melanogaster GN=RpL10Ab PE=2 SV=2	R10AB_DROME	24 kDa		2	3	6
139	GM12291p OS=Drosophila melanogaster GN=Tapdelta PE=2 SV=1	Q7KLX3_DROME	18 kDa		3	4	4
140	40S ribosomal protein S10b OS=Drosophila melanogaster GN=RpS10b PE=1 SV=2	RS10B_DROME	18 kDa		4	3	4
141	CG11876, isoform A OS=Drosophila melanogaster GN=CG11876 PE=2 SV=1	Q7K5K3_DROME	39 kDa			4	5
142	Eukaryotic translation initiation factor 2 subunit 1 OS=Drosophila melanogaster GN=eIF-2alpha PE=2 SV=1	IF2A_DROME	39 kDa		4
143	FI02809p OS=Drosophila melanogaster GN=RpL35 PE=2 SV=2	Q9W499_DROME	14 kDa		2		9
144	CG5726 OS=Drosophila melanogaster GN=CG5726 PE=2 SV=1	Q7JRH5_DROME	87 kDa				9
145	Chorion peroxidase OS=Drosophila melanogaster GN=Pxt PE=2 SV=3	PERC_DROME	91 kDa		8	3
146	Heat shock protein 26 OS=Drosophila melanogaster GN=Hsp26 PE=1 SV=2	HSP26_DROME	23 kDa		8
147	GH13256p OS=Drosophila melanogaster GN=Thiolase PE=2 SV=1	Q9W1H8_DROME	51 kDa		2	3	4
148	60S ribosomal protein L14 OS=Drosophila melanogaster GN=RpL14 PE=2 SV=1	RL14_DROME	19 kDa		6	2	3
149	Isoform A of 40S ribosomal protein SA OS=Drosophila melanogaster GN=sta	sp|P38979-2|RSSA_DROME (+1)	30 kDa				6
150	Eukaryotic translation initiation factor 2 subunit 3 OS=Drosophila melanogaster GN=Su(var)3-9 PE=2 SV=1	sp|Q24208|IF2G_DROME	51 kDa		7	4
151	60S ribosomal protein L4 OS=Drosophila melanogaster GN=RpL4 PE=2 SV=2	RL4_DROME	45 kDa		8	4
152	Lingerer, isoform E OS=Drosophila melanogaster GN=lig PE=4 SV=1	E1JH02_DROME (+3)	135 kDa		5	5
153	AT27578p OS=Drosophila melanogaster GN=rin PE=2 SV=1	Q9VFT4_DROME	75 kDa		6	4
154	GH13725p OS=Drosophila melanogaster GN=Tcp-1zeta PE=2 SV=1	Q9VXQ5_DROME	58 kDa		6	4
155	Cdc2-related-kinase, isoform A OS=Drosophila melanogaster GN=cdc2rk PE=2 SV=1	A1Z840_DROME	43 kDa				9
156	Ribosomal protein S19a, isoform C OS=Drosophila melanogaster GN=RpS19a PE=4 SV=1	E2QD65_DROME (+1)	17 kDa		8
157	RE25263p OS=Drosophila melanogaster GN=RpL30 PE=2 SV=1	Q9VJ19_DROME	12 kDa		4		5
158	CG5746, isoform C OS=Drosophila melanogaster GN=CG5746 PE=2 SV=1	Q8IGI0_DROME (+1)	49 kDa		4	4	3
159	LD47396p OS=Drosophila melanogaster GN=Tcp-1eta PE=2 SV=2	Q9VHL2_DROME	59 kDa		6	3
160	UPF0430 protein CG31712 OS=Drosophila melanogaster GN=CG31712 PE=1 SV=3	U430_DROME	36 kDa		2	2
161	Cyclin K, isoform A OS=Drosophila melanogaster GN=CycK PE=2 SV=1	Q961D1_DROME	45 kDa		3	4
162	Actin-related protein 3 OS=Drosophila melanogaster GN=Arp66B PE=2 SV=3	ARP3_DROME	47 kDa		7	3
163	CCHC-type zinc finger protein CG3800 OS=Drosophila melanogaster GN=CG3800 PE=1 SV=1	Y3800_DROME	18 kDa		5
164	Threonyl-tRNA synthetase, isoform B OS=Drosophila melanogaster GN=Aats-thr PE=2 SV=1	Q8IP94_DROME (+1)	79 kDa		5	3	3
165	Moca-cyp, isoform A OS=Drosophila melanogaster GN=Moca-cyp PE=2 SV=1	Q9VAW1_DROME	113 kDa		2	6
166	Heat shock protein 27 OS=Drosophila melanogaster GN=Hsp27 PE=1 SV=2	HSP27_DROME	24 kDa		6	2	4
167	Thioredoxin-1 OS=Drosophila melanogaster GN=dhd PE=1 SV=1	THIO1_DROME	12 kDa				6
168	Isoform A of Calcium-transporting ATPase sarcoplasmic/endoplasmic reticulum type OS=Drosophila melanogaster GN=Ca-P60A	sp|P22700-2|ATC1_DROME (+1)	110 kDa		8
169	ATP-dependent RNA helicase WM6 OS=Drosophila melanogaster GN=Hel25E PE=1 SV=1	DX39B_DROME	49 kDa		5	4
170	Importin subunit alpha OS=Drosophila melanogaster GN=Pen PE=1 SV=2	IMA_DROME	58 kDa		2	2	3
171	Growl, isoform B (Fragment) OS=Drosophila melanogaster GN=lost PE=2 SV=2	Q8IPM3_DROME (+1)	59 kDa		4	3
172	Protein piwi OS=Drosophila melanogaster GN=piwi PE=2 SV=1	PIWI_DROME	97 kDa			26
173	CG32165 OS=Drosophila melanogaster GN=CG32165 PE=4 SV=2	Q9I7R5_DROME (+1)	121 kDa		3	2
174	CG4857, isoform D OS=Drosophila melanogaster GN=tyf PE=4 SV=1	E1JJD4_DROME (+3)	202 kDa		3	5
175	T-complex protein 1 subunit delta OS=Drosophila melanogaster GN=CG5525 PE=2 SV=1	Q9VK69_DROME	57 kDa			4
176	Fondue, isoform A OS=Drosophila melanogaster GN=fon PE=2 SV=1	Q8INW9_DROME (+1)	57 kDa		5
177	60S ribosomal protein L27 OS=Drosophila melanogaster GN=RpL27 PE=2 SV=1	Q9VBN5_DROME	16 kDa				6
178	Upheld, isoform H OS=Drosophila melanogaster GN=up PE=4 SV=1	E1JJP0_DROME (+10)	45 kDa		2	2
179	Polychaetoid, isoform J OS=Drosophila melanogaster GN=pyd PE=2 SV=4	Q9VHK1_DROME	188 kDa			2
180	CG17018, isoform D OS=Drosophila melanogaster GN=CG17018-RD PE=2 SV=1	Q7KWG9_DROME (+2)	148 kDa		3	2
181	60S ribosomal protein L7 OS=Drosophila melanogaster GN=RpL7 PE=2 SV=2	RL7_DROME	30 kDa		6
182	AT12460p OS=Drosophila melanogaster GN=BG:DS02740.2 PE=2 SV=2	Q9VJL9_DROME	34 kDa				3
183	60S ribosomal protein L36 OS=Drosophila melanogaster GN=RpL36 PE=3 SV=1	RL36_DROME	14 kDa		2
184	Isoform C of La-related protein OS=Drosophila melanogaster GN=larp	sp|Q9VAW5-1|LARP_DROME (+2)	151 kDa			2
185	Isoform Non-muscle of Alpha-actinin, sarcomeric OS=Drosophila melanogaster GN=Actn	sp|P18091-2|ACTN_DROME (+4)	103 kDa		5
186	LD20211p OS=Drosophila melanogaster GN=Tudor-SN PE=1 SV=1	Q9W0S7_DROME	103 kDa		15
187	Elongation factor 2 OS=Drosophila melanogaster GN=Ef2b PE=2 SV=4	sp|P13060|EF2_DROME	94 kDa		5
188	Protein l(2)37Cc OS=Drosophila melanogaster GN=l(2)37Cc PE=2 SV=2	L2CC_DROME	30 kDa		4
189	BcDNA.LD10457 OS=Drosophila melanogaster GN=SsRbeta PE=2 SV=2	Q9VUZ0_DROME	21 kDa				2
190	CG13472 OS=Drosophila melanogaster GN=CG13472 PE=2 SV=1	Q9VUH8_DROME	92 kDa				2
191	CG7564 OS=Drosophila melanogaster GN=CG7564 PE=2 SV=1	Q9VVI1_DROME	48 kDa		2	2
192	Vitellogenin-2 OS=Drosophila melanogaster GN=Yp2 PE=1 SV=2	VIT2_DROME	50 kDa	TRUE	4
193	Arrest defective 1, isoform A OS=Drosophila melanogaster GN=vnc PE=2 SV=1	Q9VT75_DROME	22 kDa				3
194	LD15481p OS=Drosophila melanogaster GN=Rs1 PE=2 SV=1	Q7JQN4_DROME	88 kDa			3
195	CG3225 OS=Drosophila melanogaster GN=CG3225 PE=2 SV=2	Q9VR29_DROME	76 kDa			3
196	Protein lava lamp OS=Drosophila melanogaster GN=lva PE=1 SV=2	LVA_DROME	316 kDa		3		2
197	LP12034p OS=Drosophila melanogaster GN=TER94 PE=2 SV=1	Q8IGZ2_DROME (+3)	32 kDa		4
198	Caprin homolog OS=Drosophila melanogaster GN=Capr PE=1 SV=1	CAPR1_DROME	104 kDa		4
199	Eukaryotic translation initiation factor 3 subunit E OS=Drosophila melanogaster GN=eIF3-S6 PE=2 SV=1	EIF3E_DROME	51 kDa		2
200	Signal recognition particle 68 kDa protein OS=Drosophila melanogaster GN=Srp68 PE=2 SV=1	SRP68_DROME	69 kDa		3
201	Cactin OS=Drosophila melanogaster GN=cactin PE=2 SV=2	Q9VR99_DROME	91 kDa			6
202	CG9281, isoform B OS=Drosophila melanogaster GN=CG9281 PE=2 SV=1	Q9VXR5_DROME	70 kDa		4
203	CG11486, isoform O OS=Drosophila melanogaster GN=CG11486 PE=4 SV=1	A8JNJ2_DROME (+5)	81 kDa		4
204	40S ribosomal protein S18 OS=Drosophila melanogaster GN=RpS18 PE=1 SV=1	RS18_DROME	18 kDa		4
205	Clathrin heavy chain OS=Drosophila melanogaster GN=Chc PE=2 SV=1	CLH_DROME	191 kDa		4
206	GH08269p OS=Drosophila melanogaster GN=tral PE=1 SV=3	Q9VTZ0_DROME	69 kDa		2
207	S-adenosylmethionine synthase OS=Drosophila melanogaster GN=Sam-S PE=2 SV=2	sp|P40320|METK_DROME (+3)	45 kDa			2
208	FI16653p1 OS=Drosophila melanogaster GN=Srp72 PE=2 SV=1	Q9VDK7_DROME	73 kDa		2
209	26S proteasome regulatory complex subunit p97 OS=Drosophila melanogaster GN=Rpn1 PE=2 SV=2	Q9VW54_DROME	102 kDa		2		2
210	Something that sticks like glue OS=Drosophila melanogaster GN=snama PE=2 SV=1	Q9XZ21_DROME	139 kDa			2
211	Ribosome biogenesis protein BRX1 homolog OS=Drosophila melanogaster GN=CG11583 PE=2 SV=2	BRX1_DROME	42 kDa				2
212	60S ribosomal protein L13 OS=Drosophila melanogaster GN=RpL13 PE=3 SV=1	RL13_DROME	25 kDa				2
213	40S ribosomal protein S24 OS=Drosophila melanogaster GN=RpS24 PE=2 SV=1	Q9W229_DROME	15 kDa				3
214	MIP16230p OS=Drosophila melanogaster GN=Vha68-2 PE=2 SV=1	A4V0N4_DROME (+1)	68 kDa			3
215	Isoleucyl-tRNA synthetase, isoform A OS=Drosophila melanogaster GN=Aats-ile PE=2 SV=1	Q8MSW0_DROME	141 kDa		3		2
216	40S ribosomal protein S29 OS=Drosophila melanogaster GN=RpS29 PE=3 SV=1	RS29_DROME	7 kDa				3
217	Protein enhancer of rudimentary OS=Drosophila melanogaster GN=e(r) PE=1 SV=1	ER_DROME	12 kDa				3
218	CG4365, isoform C OS=Drosophila melanogaster GN=CG4365 PE=2 SV=1	Q8IPU3_DROME (+2)	39 kDa		3
219	Eukaryotic translation initiation factor 3 subunit G-1 OS=Drosophila melanogaster GN=eIF3-S4-1 PE=1 SV=1	EI3G1_DROME	30 kDa		2
220	Decapping protein 1, isoform A OS=Drosophila melanogaster GN=Dcp1 PE=1 SV=1	Q9W1H5_DROME	41 kDa		2
221	GH14043p OS=Drosophila melanogaster GN=Rca1 PE=2 SV=1	Q9VM76_DROME	47 kDa		2
222	Actin-like protein 87C OS=Drosophila melanogaster GN=Arp87C PE=2 SV=2	ACTZ_DROME	43 kDa		2
223	CG32409 OS=Drosophila melanogaster GN=CG32409 PE=2 SV=2	Q8I937_DROME	39 kDa			2
224	26S proteasome regulatory complex subunit p48A OS=Drosophila melanogaster GN=Rpt3 PE=2 SV=1	Q9V405_DROME	47 kDa		2		2
225	Catenin alpha OS=Drosophila melanogaster GN=alpha-Cat PE=1 SV=2	CTNA_DROME	102 kDa		2
226	CG3523, isoform B OS=Drosophila melanogaster GN=CG3523 PE=4 SV=1	B7Z001_DROME (+1)	278 kDa			2
227	Isoform B of 26S proteasome non-ATPase regulatory subunit 1 OS=Drosophila melanogaster GN=Rpn2	sp|Q9V3P6-2|PSMD1_DROME (+1)	105 kDa		2		2
228	Protein swallow OS=Drosophila melanogaster GN=swa PE=1 SV=1	SWA_DROME	62 kDa		3
END OF FILE

## Sheet: IP2-Unwighted_spectrum_count
#	Identified Proteins	Accession Number	Molecular Weight	Protein Grouping Ambiguity	GFP-Vasa WT	GFP-Vasa E400Q	CTRL GFP
1	BcDNA.GH11110 OS=Drosophila melanogaster GN=nito PE=2 SV=1	Q7KMJ6_DROME	89 kDa		175	450	350
2	Nucleolar protein at 60B, isoform C OS=Drosophila melanogaster GN=Nop60B PE=4 SV=1	E1JGV6_DROME (+1)	57 kDa		131	373	362
3	rRNA 2'-O-methyltransferase fibrillarin OS=Drosophila melanogaster GN=Fib PE=2 SV=1	FBRL_DROME	35 kDa		191	339	248
4	Zipper, isoform C OS=Drosophila melanogaster GN=zip PE=4 SV=1	Q59E58_DROME (+1)	227 kDa	TRUE			668
5	CG8929, isoform A OS=Drosophila melanogaster GN=CG8929 PE=2 SV=1	Q960E4_DROME	68 kDa		95	209	151
6	Actin-5C OS=Drosophila melanogaster GN=Act5C PE=1 SV=4	ACT1_DROME	42 kDa	TRUE	14	8	356
7	Probable H/ACA ribonucleoprotein complex subunit 1 OS=Drosophila melanogaster GN=CG4038 PE=1 SV=1	GAR1_DROME	23 kDa		77	127	160
8	U1 small nuclear ribonucleoprotein 70 kDa OS=Drosophila melanogaster GN=snRNP-U1-70K PE=1 SV=2	RU17_DROME	53 kDa		103	160	48
9	FI01658p OS=Drosophila melanogaster GN=RpL23A PE=2 SV=1	Q9W0A8_DROME	29 kDa		68	99	94
10	Zeljko_GFP/GFP_Vasa_E400Q/GFP_Vasa_WT	Zeljko_GFP_Vasa_E400Q	99 kDa		146	134	3
11	Rm62, isoform H OS=Drosophila melanogaster GN=Rm62 PE=3 SV=1	E1JJ68_DROME (+4)	62 kDa	TRUE	94	117	44
12	H/ACA ribonucleoprotein complex subunit 3 OS=Drosophila melanogaster GN=CG7637 PE=1 SV=1	NOP10_DROME	8 kDa		41	57	81
13	H/ACA ribonucleoprotein complex subunit 2-like protein OS=Drosophila melanogaster GN=NHP2 PE=1 SV=1	NHP2_DROME	18 kDa		39	68	76
14	40S ribosomal protein S2 OS=Drosophila melanogaster GN=RpS2 PE=1 SV=2	RS2_DROME	29 kDa		40	64	83
15	CG10206-PA OS=Drosophila melanogaster GN=nop5 PE=2 SV=2	Q9VM69_DROME	57 kDa		63	92	33
16	Protein virilizer OS=Drosophila melanogaster GN=vir PE=1 SV=1	VIR_DROME	209 kDa		30	75	64
17	ATP-dependent RNA helicase bel OS=Drosophila melanogaster GN=bel PE=1 SV=1	DDX3_DROME	85 kDa	TRUE	101	88	24
18	FI04781p OS=Drosophila melanogaster GN=Nop56 PE=2 SV=1	Q95WY3_DROME	55 kDa		72	88	32
19	CG12581, isoform A OS=Drosophila melanogaster GN=CG12581-RA PE=2 SV=2	Q9VMY3_DROME	71 kDa		18	71	67
20	ATP-dependent RNA helicase abstrakt OS=Drosophila melanogaster GN=abs PE=1 SV=1	DDX41_DROME	69 kDa		19	79	50
21	CG12075, isoform A OS=Drosophila melanogaster GN=CG12075-RB PE=2 SV=3	Q9W3B8_DROME	114 kDa		62	86	34
22	CG3689, isoform C OS=Drosophila melanogaster GN=CG3689 PE=4 SV=1	Q0E8G6_DROME (+1)	27 kDa		33	49	48
23	CG6340, isoform B OS=Drosophila melanogaster GN=CG6340 PE=2 SV=1	Q9VXU3_DROME	57 kDa		11	38	42
24	Polyadenylate-binding protein OS=Drosophila melanogaster GN=pAbp PE=1 SV=3	PABP_DROME	70 kDa		42	64	22
25	Serine/threonine-protein kinase PITSLRE OS=Drosophila melanogaster GN=Pitslre PE=1 SV=1	KP58_DROME	109 kDa		8	34	34
26	Small nuclear ribonucleoprotein-associated protein B OS=Drosophila melanogaster GN=SmB PE=1 SV=1	RSMB_DROME	21 kDa		15	17	7
27	Nopp140, isoform B OS=Drosophila melanogaster GN=Nopp140 PE=2 SV=1	Q7KTV5_DROME	71 kDa	TRUE	11	43	22
28	CG32685 OS=Drosophila melanogaster GN=ZAP3 PE=2 SV=2	Q9W2Y5_DROME	205 kDa		8	39	26
29	RE28824p OS=Drosophila melanogaster GN=RpL12 PE=2 SV=1	Q9W1B9_DROME	18 kDa		18	34	21
30	Heat shock 70 kDa protein cognate 4 OS=Drosophila melanogaster GN=Hsc70-4 PE=1 SV=3	HSP7D_DROME	71 kDa	TRUE	9	34	20
31	Cleavage and polyadenylation specificity factor subunit CG7185 OS=Drosophila melanogaster GN=CG7185 PE=1 SV=2	CPSF6_DROME	71 kDa		17	20	20
32	Probable small nuclear ribonucleoprotein Sm D2 OS=Drosophila melanogaster GN=SmD2 PE=3 SV=1	SMD2_DROME	14 kDa		19	27	8
33	NHP2-like protein 1 homolog OS=Drosophila melanogaster GN=hoip PE=2 SV=1	NH2L1_DROME	14 kDa		19	21	11
34	40S ribosomal protein S11 OS=Drosophila melanogaster GN=RpS11 PE=1 SV=1	RS11_DROME	18 kDa		13	22	22
35	UPF0428 protein CG16865 OS=Drosophila melanogaster GN=CG16865 PE=1 SV=1	U428_DROME	28 kDa		15	22	11
36	60S ribosomal protein L27a OS=Drosophila melanogaster GN=RpL27A PE=2 SV=2	RL27A_DROME	17 kDa		14	16	16
37	40S ribosomal protein S4 OS=Drosophila melanogaster GN=RpS4 PE=2 SV=2	RS4_DROME	29 kDa		8	8	13
38	Pre-mRNA-splicing regulator female-lethal(2)D OS=Drosophila melanogaster GN=fl(2)d PE=1 SV=2	sp|Q9Y091|FL2D_DROME	59 kDa		4	28	17
39	CG17255, isoform A OS=Drosophila melanogaster GN=nocte PE=2 SV=4	Q9W2U7_DROME	236 kDa		2	28	19
40	40S ribosomal protein S14 OS=Drosophila melanogaster GN=RpS14a PE=1 SV=1	RS14_DROME	16 kDa		12	12	18
41	40S ribosomal protein S8 OS=Drosophila melanogaster GN=RpS8 PE=1 SV=1	RS8_DROME	24 kDa		8	13	9
42	Probable small nuclear ribonucleoprotein G OS=Drosophila melanogaster GN=SmG PE=3 SV=1	RUXG_DROME	9 kDa		19	12
43	60S ribosomal protein L23 OS=Drosophila melanogaster GN=RpL23 PE=2 SV=2	RL23_DROME	15 kDa			14	10
44	60S ribosomal protein L10 OS=Drosophila melanogaster GN=RpL10 PE=2 SV=1	RL10_DROME	26 kDa		3	13	24
45	CG7358 OS=Drosophila melanogaster GN=CG7358 PE=2 SV=1	Q9VWN4_DROME	129 kDa		4	16	26
46	Ubiquitin-60S ribosomal protein L40 OS=Drosophila melanogaster GN=RpL40 PE=1 SV=2	RL40_DROME	15 kDa	TRUE	7	9	9
47	Hook-like, isoform A OS=Drosophila melanogaster GN=Acn PE=2 SV=1	Q9VJ12_DROME	84 kDa		4	27	11
48	Isoform I of Myosin heavy chain 95F OS=Drosophila melanogaster GN=jar	sp|Q01989-3|MYS9_DROME (+1)	122 kDa				38
49	CG1622 OS=Drosophila melanogaster GN=CG1622-RA PE=2 SV=1	Q9VYE9_DROME	45 kDa		6	19	10
50	DNA-binding protein K10 OS=Drosophila melanogaster GN=fs(1)K10 PE=2 SV=2	K10_DROME	51 kDa			15
51	40S ribosomal protein S27 OS=Drosophila melanogaster GN=RpS27 PE=2 SV=1	Q9VBU9_DROME	9 kDa		13	11	12
52	Darkener of apricot, isoform N OS=Drosophila melanogaster GN=Doa PE=4 SV=1	A4V3J9_DROME (+6)	68 kDa			23	7
53	Polychaetoid, isoform J OS=Drosophila melanogaster GN=pyd PE=2 SV=4	Q9VHK1_DROME	188 kDa			27	6
54	Vitellogenin-3 OS=Drosophila melanogaster GN=Yp3 PE=1 SV=1	VIT3_DROME	46 kDa		25	28	12
55	Megator OS=Drosophila melanogaster GN=Mtor PE=4 SV=1	A1Z8P9_DROME	262 kDa		5	27	4
56	60S ribosomal protein L22 OS=Drosophila melanogaster GN=RpL22 PE=1 SV=2	RL22_DROME	31 kDa		9	11	6
57	Beta-Tubulin at 56D, isoform A OS=Drosophila melanogaster GN=betaTub56D PE=2 SV=1	A1ZBL0_DROME (+1)	51 kDa		12	14	4
58	SD06613p OS=Drosophila melanogaster GN=vig2 PE=2 SV=1	Q960D3_DROME (+1)	45 kDa		3	17	10
59	CG3056, isoform B OS=Drosophila melanogaster GN=ssx PE=2 SV=1	Q8IH14_DROME	49 kDa		20	19	9
60	U1 small nuclear ribonucleoprotein C OS=Drosophila melanogaster GN=snRNP-U1-C PE=1 SV=1	RU1C_DROME	16 kDa			24
61	Cyclin-dependent kinase 12 OS=Drosophila melanogaster GN=Cdk12 PE=1 SV=1	CDK12_DROME	128 kDa	TRUE		16	8
62	Isoform C of Fragile X mental retardation syndrome-related protein 1 OS=Drosophila melanogaster GN=Fmr1	sp|Q9NFU0-2|FMR1_DROME (+1)	76 kDa		5	20	4
63	Small nuclear ribonucleoprotein Sm D3 OS=Drosophila melanogaster GN=SmD3 PE=1 SV=1	SMD3_DROME	16 kDa		10	6
64	Ribosomal protein S15, isoform B OS=Drosophila melanogaster GN=RpS15 PE=2 SV=1	A1ZAH8_DROME (+1)	17 kDa		6	7	5
65	CG4877, isoform A OS=Drosophila melanogaster GN=CG4877 PE=2 SV=3	Q9VV52_DROME	125 kDa		5	19
66	Dilute class unconventional myosin, isoform C OS=Drosophila melanogaster GN=didum PE=4 SV=1	A1Z6Z8_DROME (+1)	208 kDa				28
67	Elongation factor 1-alpha 1 OS=Drosophila melanogaster GN=Ef1alpha48D PE=1 SV=2	EF1A1_DROME	50 kDa			5	14
68	Probable small nuclear ribonucleoprotein E OS=Drosophila melanogaster GN=SmE PE=3 SV=1	RUXE_DROME	11 kDa		7	17
69	AUBERGINE OS=Drosophila melanogaster GN=aub PE=1 SV=1	O76922_DROME	99 kDa			26
70	CG2063 OS=Drosophila melanogaster GN=CG2063 PE=2 SV=1	Q7K0K1_DROME	36 kDa			19	10
71	Isoform 1 of Myosin heavy chain, non-muscle OS=Drosophila melanogaster GN=zip	sp|Q99323-1|MYSN_DROME (+3)	232 kDa	TRUE			637
72	Isoform B of Putative ATP-dependent RNA helicase me31b OS=Drosophila melanogaster GN=me31B	sp|P23128-2|DDX6_DROME (+1)	49 kDa		18	11	2
73	Moca-cyp, isoform A OS=Drosophila melanogaster GN=Moca-cyp PE=2 SV=1	Q9VAW1_DROME	113 kDa			12	12
74	60S ribosomal protein L29 OS=Drosophila melanogaster GN=RpL29 PE=1 SV=1	RL29_DROME	9 kDa		22	3	14
75	CCHC-type zinc finger protein CG3800 OS=Drosophila melanogaster GN=CG3800 PE=1 SV=1	Y3800_DROME	18 kDa		13	6
76	LD37574p OS=Drosophila melanogaster GN=yps PE=2 SV=1	Q95RE4_DROME	38 kDa				17
77	Eukaryotic initiation factor 4A OS=Drosophila melanogaster GN=eIF-4a PE=2 SV=3	IF4A_DROME	46 kDa		9	6
78	Small nuclear ribonucleoprotein F OS=Drosophila melanogaster GN=SmF PE=3 SV=2	RUXF_DROME	10 kDa		9	6	3
79	CG7564 OS=Drosophila melanogaster GN=CG7564 PE=2 SV=1	Q9VVI1_DROME	48 kDa			15	4
80	CG9018, isoform B OS=Drosophila melanogaster GN=CG9018 PE=2 SV=1	Q8SX50_DROME (+1)	38 kDa			6	6
81	Cactin OS=Drosophila melanogaster GN=cactin PE=2 SV=2	Q9VR99_DROME	91 kDa			15
82	Actin, larval muscle OS=Drosophila melanogaster GN=Act79B PE=1 SV=2	ACT4_DROME	42 kDa	TRUE			216
83	CG3198 OS=Drosophila melanogaster GN=CG3198 PE=2 SV=2	Q9W3X8_DROME	50 kDa			15	5
84	Eukaryotic translation initiation factor 3 subunit D-1 OS=Drosophila melanogaster GN=eIF-3p66 PE=1 SV=1	EI3D1_DROME	64 kDa			12
85	CG13625 OS=Drosophila melanogaster GN=CG13625 PE=2 SV=1	Q9VC60_DROME	76 kDa			12
86	CG5913 OS=Drosophila melanogaster GN=CG5913 PE=4 SV=1	Q9VBK9_DROME	50 kDa			13
87	Actin-57B OS=Drosophila melanogaster GN=Act57B PE=1 SV=1	ACT3_DROME (+1)	42 kDa	TRUE			244
88	CG18809, isoform A OS=Drosophila melanogaster GN=CG18809 PE=2 SV=1	Q9I7R7_DROME	40 kDa			7	5
89	Uncharacterized protein CG1785 OS=Drosophila melanogaster GN=CG1785 PE=1 SV=1	GSCR2_DROME	56 kDa			6	4
90	40S ribosomal protein S26 OS=Drosophila melanogaster GN=RpS26 PE=1 SV=1	RS26_DROME	13 kDa				11
91	Protein piwi OS=Drosophila melanogaster GN=piwi PE=2 SV=1	PIWI_DROME	97 kDa			14
92	40S ribosomal protein S25 OS=Drosophila melanogaster GN=RpS25 PE=1 SV=3	RS25_DROME	13 kDa		4	4	4
93	ATP-dependent RNA helicase WM6 OS=Drosophila melanogaster GN=Hel25E PE=1 SV=1	DX39B_DROME	49 kDa		5	4
94	CG15747 OS=Drosophila melanogaster GN=CG15747 PE=2 SV=2	Q9VYE3_DROME	45 kDa			6	3
95	Aly OS=Drosophila melanogaster GN=Ref1 PE=2 SV=1	Q9V3E7_DROME	28 kDa		4	6
96	Lingerer, isoform E OS=Drosophila melanogaster GN=lig PE=4 SV=1	E1JH02_DROME (+2)	135 kDa			11
97	Ribosomal protein S19a, isoform C OS=Drosophila melanogaster GN=RpS19a PE=4 SV=1	E2QD65_DROME (+1)	17 kDa				10
98	CG16903 OS=Drosophila melanogaster GN=EG:67A9.2 PE=2 SV=1	Q9W526_DROME	62 kDa			5
99	Poly(A) RNA polymerase gld-2 homolog B OS=Drosophila melanogaster GN=wisp PE=1 SV=1	GLD2B_DROME	151 kDa				7
100	U1 small nuclear ribonucleoprotein A OS=Drosophila melanogaster GN=snf PE=1 SV=1	SNRPA_DROME	25 kDa		5
101	Spectrin alpha chain OS=Drosophila melanogaster GN=alpha-Spec PE=1 SV=2	SPTCA_DROME	278 kDa				14
102	CG32306, isoform E OS=Drosophila melanogaster GN=CG32306 PE=4 SV=1	E1JIB9_DROME (+3)	184 kDa				11
103	Fondue, isoform A OS=Drosophila melanogaster GN=fon PE=2 SV=1	Q8INW9_DROME (+1)	57 kDa				11
104	Heat shock 70 kDa protein cognate 3 OS=Drosophila melanogaster GN=Hsc70-3 PE=2 SV=2	HSP7C_DROME	72 kDa	TRUE		11	6
105	CG6686, isoform A OS=Drosophila melanogaster GN=CG6686 PE=2 SV=1	Q95TU2_DROME (+1)	113 kDa			5
106	Encore, isoform E OS=Drosophila melanogaster GN=enc PE=4 SV=1	A8JNJ9_DROME (+3)	200 kDa			5
107	CG10263, isoform C OS=Drosophila melanogaster GN=Hakai PE=2 SV=1	Q8INV9_DROME (+1)	33 kDa				9
108	RE21974p OS=Drosophila melanogaster GN=Tm1 PE=2 SV=1	Q6NN28_DROME (+2)	33 kDa				8
109	Pinin, isoform B OS=Drosophila melanogaster GN=Pnn PE=4 SV=1	A8JQW3_DROME (+1)	36 kDa		3	3
110	Ribosomal protein S3A, isoform F OS=Drosophila melanogaster GN=RpS3A PE=4 SV=1	H9XVL9_DROME (+1)	30 kDa			4	3
111	Isoform B of Probable RNA helicase armi OS=Drosophila melanogaster GN=armi	sp|Q6J5K9-2|ARMI_DROME (+1)	136 kDa			8
112	CG42257, isoform H OS=Drosophila melanogaster GN=Snp PE=2 SV=2	Q8MLU3_DROME	75 kDa			7
113	GH08269p OS=Drosophila melanogaster GN=tral PE=1 SV=3	Q9VTZ0_DROME	69 kDa		5	7
114	CG5746, isoform C OS=Drosophila melanogaster GN=CG5746 PE=2 SV=1	Q8IGI0_DROME (+1)	49 kDa				3
115	Histone H2A.v OS=Drosophila melanogaster GN=His2Av PE=1 SV=2	H2AV_DROME	15 kDa				3
116	CG6422, isoform C OS=Drosophila melanogaster GN=CG6422 PE=4 SV=1	A8JRA4_DROME (+2)	78 kDa			6
117	CG6961 OS=Drosophila melanogaster GN=CG6961 PE=2 SV=2	Q9VWQ3_DROME (+1)	53 kDa			6
118	CG11266, isoform A OS=Drosophila melanogaster GN=CG11266 PE=2 SV=1	Q9VM49_DROME	66 kDa			7
119	Spectrin beta chain OS=Drosophila melanogaster GN=beta-Spec PE=1 SV=2	SPTCB_DROME	266 kDa				7
120	Isoform B of Pyruvate kinase OS=Drosophila melanogaster GN=PyK	sp|O62619-2|KPYK_DROME (+1)	55 kDa			4
121	Vitellogenin-2 OS=Drosophila melanogaster GN=Yp2 PE=1 SV=2	VIT2_DROME	50 kDa		15		5
122	CG4857, isoform D OS=Drosophila melanogaster GN=tyf PE=4 SV=1	E1JJD4_DROME (+3)	202 kDa				7
123	Isoform 3 of Gelsolin OS=Drosophila melanogaster GN=Gel	sp|Q07171-3|GELS_DROME (+1)	98 kDa				5
124	RNA-binding protein cabeza OS=Drosophila melanogaster GN=caz PE=2 SV=2	CAZ_DROME	39 kDa			8
125	Myosin-2 essential light chain OS=Drosophila melanogaster GN=Mlc-c PE=1 SV=1	MLC2_DROME	17 kDa				8
126	Voltage-dependent anion-selective channel OS=Drosophila melanogaster GN=porin PE=1 SV=3	VDAC_DROME	31 kDa				6
127	Cdc2-related-kinase, isoform A OS=Drosophila melanogaster GN=cdc2rk PE=2 SV=1	A1Z840_DROME	43 kDa			3	3
128	Ecdysone-induced protein 63E, isoform G OS=Drosophila melanogaster GN=Eip63E PE=2 SV=1	Q7KM03_DROME (+2)	60 kDa	TRUE	2	5
129	LP12034p OS=Drosophila melanogaster GN=TER94 PE=2 SV=1	Q8IGZ2_DROME (+3)	32 kDa		3
130	CG5726 OS=Drosophila melanogaster GN=CG5726 PE=2 SV=1	Q7JRH5_DROME	87 kDa			3
131	Isoform 2 of Zinc finger matrin-type protein CG9776 OS=Drosophila melanogaster GN=CG9776	sp|Q9V468-2|Y9776_DROME (+1)	77 kDa			3	2
132	Karst, isoform E OS=Drosophila melanogaster GN=kst PE=4 SV=2	A8JNJ6_DROME (+3)	498 kDa				6
133	EF-hand domain-containing protein CG10641 OS=Drosophila melanogaster GN=CG10641 PE=2 SV=1	EFHD_DROME	25 kDa				4
134	40S ribosomal protein S23 OS=Drosophila melanogaster GN=RpS23 PE=2 SV=1	RS23_DROME	16 kDa			5	4
135	40S ribosomal protein S10b OS=Drosophila melanogaster GN=RpS10b PE=1 SV=2	RS10B_DROME	18 kDa				2
136	GH14043p OS=Drosophila melanogaster GN=Rca1 PE=2 SV=1	Q9VM76_DROME	47 kDa				3
137	Something that sticks like glue OS=Drosophila melanogaster GN=snama PE=2 SV=1	Q9XZ21_DROME	139 kDa			3
138	Actin-42A OS=Drosophila melanogaster GN=Act42A PE=1 SV=3	ACT2_DROME	42 kDa	TRUE			283
139	Tetratricopeptide repeat protein 14 homolog OS=Drosophila melanogaster GN=CG6621 PE=1 SV=2	TTC14_DROME	100 kDa			3
140	60S ribosomal protein L24 OS=Drosophila melanogaster GN=RpL24 PE=1 SV=1	RL24_DROME	18 kDa			2	2
141	Protein cup OS=Drosophila melanogaster GN=cup PE=1 SV=3	CUP_DROME	126 kDa			2
142	AT27578p OS=Drosophila melanogaster GN=rin PE=2 SV=1	Q9VFT4_DROME	75 kDa		6
143	CG6695, isoform A OS=Drosophila melanogaster GN=CG6695 PE=2 SV=3	Q9VC54_DROME	109 kDa				2
144	CG17168 OS=Drosophila melanogaster GN=CG17168 PE=2 SV=1	Q9W5Q1_DROME	50 kDa			2
145	Probable 60S ribosomal protein L37-A OS=Drosophila melanogaster GN=RpL37a PE=3 SV=1	RL371_DROME	11 kDa			2
146	Isoform D of PERQ amino acid-rich with GYF domain-containing protein CG11148 OS=Drosophila melanogaster GN=CG11148	sp|Q7KQM6-2|PERQ1_DROME (+1)	173 kDa			2
147	IP17351p OS=Drosophila melanogaster GN=RpL36A PE=2 SV=2	Q9VLT7_DROME	13 kDa				5
148	Probable small nuclear ribonucleoprotein Sm D1 OS=Drosophila melanogaster GN=SmD1 PE=1 SV=1	SMD1_DROME	14 kDa			3
149	LD26546p OS=Drosophila melanogaster GN=l(1)G0320 PE=2 SV=1	Q9W335_DROME	33 kDa			2
150	Eukaryotic translation initiation factor 3 subunit G-1 OS=Drosophila melanogaster GN=eIF3-S4-1 PE=1 SV=1	EI3G1_DROME	30 kDa		2
151	Caprin homolog OS=Drosophila melanogaster GN=Capr PE=1 SV=1	CAPR1_DROME	104 kDa		3
END OF FILE

## Sheet: QPPC_SIG_Output_GFP-VasWT.csv
ID	MEAN_ratio	STANDARD_DEVIATION	LOG_MEAN	LOG_SD	NUMBER_OF_OBSERVATIONS	PERM_P.VALUE	ADJ_P.VALUE	Z-SCORE	SIGNIFICANT_UNDER_P-VALUE	SIGNIFICANT_UNDER_CRITERION	SIGNIFICANT_UNDER_BOTH
Vasa	74.644	20.9932	4.31273	0.279423	2	0.000999001	0.000999001	3.43003	TRUE	TRUE	TRUE
Y3800_DROME	10.7663	13.8054	2.37642	1.15095	2	0.01998	0.01998	1.55715	TRUE	TRUE	TRUE
RUXG_DROME	10.7332	22.8138	2.37334	1.69199	2	0.030969	0.030969	1.55417	TRUE	TRUE	TRUE
P23128-2 DDX6_DROME (+1)	9.4804	8.11468	2.24923	0.81079	2	0.043956	0.043956	1.43412	TRUE	TRUE	TRUE
IF4A_DROME	9.39538	8.18215	2.24022	0.823531	2	0.042957	0.042957	1.42541	TRUE	TRUE	TRUE
Q9VFT4_DROME	8.0124	3.88037	2.08099	0.475297	2	0.0639361	0.0639361	1.2714	FALSE	TRUE	FALSE
RU17_DROME	7.82473	7.96018	2.05729	0.945323	2	0.0649351	0.0649351	1.24847	FALSE	TRUE	FALSE
DX39B_DROME	6.677	3.23365	1.89867	0.475297	2	0.0899101	0.0899101	1.09505	FALSE	TRUE	FALSE
O76876_DROME (+1)	6.29514	3.8108	1.83978	0.588246	2	0.0889111	0.0889111	1.03808	FALSE	TRUE	FALSE
RUXE_DROME	5.58638	7.56343	1.72033	1.20335	2	0.123876	0.123876	0.922551	FALSE	TRUE	FALSE
DDX3_DROME	5.4298	2.91042	1.6919	0.52394	2	0.128871	0.128871	0.895053	FALSE	TRUE	FALSE
PABP_DROME	5.21879	2.87511	1.65227	0.537855	2	0.117882	0.117882	0.856715	FALSE	TRUE	FALSE
SMD2_DROME	4.75273	0.460123	1.55872	0.096737	2	0.157842	0.157842	0.766232	FALSE	TRUE	FALSE
VIT2_DROME	4.62596	1.26545	1.53168	0.271876	2	0.150849	0.150849	0.740084	FALSE	TRUE	FALSE
Q8IGZ2_DROME (+3)	4.62596	1.26545	1.53168	0.271876	2	0.174825	0.174825	0.740084	FALSE	TRUE	FALSE
CAPR1_DROME	4.62596	1.26545	1.53168	0.271876	2	0.187812	0.187812	0.740084	FALSE	TRUE	FALSE
Q7KM03_DROME (+2)	4.22291	0.730761	1.44052	0.172618	2	0.17982	0.17982	0.651909	FALSE	TRUE	FALSE
Q9VTZ0_DROME	4.22291	5.25786	1.44052	1.12321	2	0.186813	0.186813	0.651909	FALSE	TRUE	FALSE
Q95WY3_DROME	4.1295	0.105661	1.41816	0.0255855	2	0.180819	0.180819	0.630274	FALSE	TRUE	FALSE
A1ZBL0_DROME (+1)	4.06146	1.88396	1.40154	0.455923	2	0.193806	0.193806	0.614205	FALSE	TRUE	FALSE
E1JJ68_DROME (+4)	3.51877	0.630234	1.25811	0.178631	2	0.242757	0.242757	0.475472	FALSE	TRUE	FALSE
VIT3_DROME	3.50553	0.521229	1.25434	0.148415	2	0.272727	0.272727	0.471825	FALSE	TRUE	FALSE
Q9VM69_DROME	3.22896	0.456414	1.17216	0.141116	2	0.315684	0.315684	0.392336	FALSE	TRUE	FALSE
RSMB_DROME	3.09085	1.14487	1.12845	0.366297	2	0.317682	0.317682	0.350054	FALSE	TRUE	FALSE
EI3G1_DROME	2.6708	1.29346	0.982378	0.475297	2	0.376623	0.376623	0.208771	FALSE	TRUE	FALSE
E1JGV6_DROME (+1)	2.29424	5.02513	0.8304	1.7275	2	0.44955	0.44955	0.0617706	FALSE	TRUE	FALSE
Q9W3B8_DROME	2.24911	1.36014	0.810535	0.587686	2	0.483516	0.483516	0.0425558	FALSE	TRUE	FALSE
U428_DROME	2.20534	0.452523	0.790882	0.204481	2	0.507493	0.507493	0.0235473	FALSE	TRUE	FALSE
Q0E8G6_DROME	1.95507	1.19509	0.670424	0.593687	2	0.577423	0.577423	-0.0929655	FALSE	FALSE	FALSE
RL22_DROME	1.80814	1.15752	0.592299	0.620109	2	0.583417	0.583417	-0.168531	FALSE	FALSE	FALSE
Q9VYE9_DROME	1.68916	1.00642	0.524233	0.579462	2	0.646354	0.646354	-0.234368	FALSE	FALSE	FALSE
CPSF6_DROME	1.49103	0.13363	0.399468	0.0895628	2	0.724276	0.724276	-0.355046	FALSE	FALSE	FALSE
NH2L1_DROME	1.27699	1.92532	0.244509	1.31147	2	0.844156	0.844156	-0.504929	FALSE	FALSE	FALSE
HSP7D_DROME	1.23396	0.685614	0.210229	0.542237	2	0.861139	0.861139	-0.538086	FALSE	FALSE	FALSE
VIR_DROME	1.22111	0.584151	0.199757	0.469696	2	0.877123	0.877123	-0.548215	FALSE	FALSE	FALSE
Q9W1B9_DROME	1.19708	0.500119	0.179887	0.411932	2	0.881119	0.881119	-0.567434	FALSE	FALSE	FALSE
Q7KMJ6_DROME	1.18105	0.394824	0.166407	0.331261	2	0.891109	0.891109	-0.580473	FALSE	FALSE	FALSE
Q9W0A8_DROME	1.07751	0.34869	0.0746574	0.320847	2	0.962038	0.962038	-0.669217	FALSE	FALSE	FALSE
RS8_DROME	1.04703	0.707996	0.0459578	0.652768	2	0.973027	0.973027	-0.696976	FALSE	FALSE	FALSE
Q9VBU9_DROME	0.982828	1.09422	-0.017321	1.02203	2	0.987013	0.987013	-0.758182	FALSE	FALSE	FALSE
DDX41_DROME	0.965283	0.425609	-0.0353339	0.434069	2	0.971029	0.971029	-0.775605	FALSE	FALSE	FALSE
NHP2_DROME	0.956615	0.00338246	-0.0443546	0.00353586	2	0.966034	0.966034	-0.78433	FALSE	FALSE	FALSE
RS14_DROME	0.944271	0.374924	-0.0573424	0.392012	2	0.958042	0.958042	-0.796893	FALSE	FALSE	FALSE
FBRL_DROME	0.918785	0.60302	-0.0847028	0.634791	2	0.931069	0.931069	-0.823357	FALSE	FALSE	FALSE
RS4_DROME	0.884019	0.332715	-0.123276	0.372059	2	0.909091	0.909091	-0.860667	FALSE	FALSE	FALSE
GAR1_DROME	0.870975	0.0395352	-0.138142	0.0453841	2	0.912088	0.912088	-0.875046	FALSE	FALSE	FALSE
Q960E4_DROME	0.850432	0.396431	-0.162011	0.4581	2	0.892108	0.892108	-0.898133	FALSE	FALSE	FALSE
RL27A_DROME	0.826237	0.861086	-0.190874	0.965427	2	0.851149	0.851149	-0.92605	FALSE	FALSE	FALSE
NOP10_DROME	0.825378	0.159654	-0.191914	0.192833	2	0.866134	0.866134	-0.927056	FALSE	FALSE	FALSE
KP58_DROME	0.807904	0.738661	-0.213312	0.860252	2	0.866134	0.866134	-0.947753	FALSE	FALSE	FALSE
Q9Y09 FL2D_DROME	0.805277	0.731846	-0.216569	0.855645	2	0.848152	0.848152	-0.950904	FALSE	FALSE	FALSE
RS2_DROME	0.802848	0.130798	-0.21959	0.162559	2	0.847153	0.847153	-0.953826	FALSE	FALSE	FALSE
RS11_DROME	0.718422	0.450383	-0.330699	0.608003	2	0.762238	0.762238	-1.06129	FALSE	FALSE	FALSE
RS25_DROME	0.713802	1.12869	-0.33715	1.36113	2	0.761239	0.761239	-1.06754	FALSE	FALSE	FALSE
Q9VMY3_DROME	0.662699	0.26349	-0.411435	0.392541	2	0.723277	0.723277	-1.13939	FALSE	FALSE	FALSE
Q9VWN4_DROME	0.562638	0.575243	-0.575119	0.949454	2	0.629371	0.629371	-1.29771	FALSE	FALSE	FALSE
ACT1_DROME	0.355047	1.16088	-1.0355	2.22746	2	0.312687	0.312687	-1.74301	FALSE	TRUE	FALSE
RL10_DROME	0.353832	0.21378	-1.03893	0.587169	2	0.370629	0.370629	-1.74633	FALSE	TRUE	FALSE

## Sheet: QPPC_SIG_Output_GFP-VasDQAD.csv
ID	MEAN_ratio	STANDARD_DEVIATION	LOG_MEAN	LOG_SD	NUMBER_OF_OBSERVATIONS	PERM_P.VALUE	ADJ_P.VALUE	Z-SCORE	SIGNIFICANT_UNDER_P-VALUE	SIGNIFICANT_UNDER_CRITERION	SIGNIFICANT_UNDER_BOTH
Vasa	61.5197	15.9134	4.11936	0.257251	2	0.000999001	0.000999001	2.90724	TRUE	TRUE	TRUE
O76922_DROME	40.1819	17.1322	3.69342	0.420156	2	0.000999001	0.000999001	2.5252	TRUE	TRUE	TRUE
PIWI_DROME	22.4124	10.7285	3.10962	0.469989	2	0.00799201	0.00799201	2.00156	TRUE	TRUE	TRUE
Q6J5K9-2 ARMI_DROME (+1)	21.5332	29.1973	3.06959	1.20481	2	0.00899101	0.00899101	1.96567	TRUE	TRUE	TRUE
Q9NFU0-2 FMR1_DROME (+1)	13.1339	17.186	2.57519	1.17031	2	0.027972	0.027972	1.52222	TRUE	TRUE	TRUE
Q9VR99_DROME	11.1445	7.07991	2.41094	0.615654	2	0.045954	0.045954	1.3749	TRUE	TRUE	TRUE
EI3D1_DROME	9.09942	5.49396	2.20821	0.586788	2	0.0799201	0.0799201	1.19306	FALSE	TRUE	FALSE
E1JH02_DROME (+3)	8.71203	4.68204	2.1647	0.525262	2	0.0859141	0.0859141	1.15404	FALSE	TRUE	FALSE
RU17_DROME	8.39838	10.3243	2.12804	1.11135	2	0.0939061	0.0939061	1.12115	FALSE	TRUE	FALSE
RUXE_DROME	7.6583	11.6781	2.03579	1.32321	2	0.102897	0.102897	1.03841	FALSE	TRUE	FALSE
RUXG_DROME	7.50357	6.85368	2.01538	0.859493	2	0.0949051	0.0949051	1.0201	FALSE	TRUE	FALSE
Q7KM03_DROME (+4)	6.94979	1.88916	1.93871	0.270184	2	0.120879	0.120879	0.951339	FALSE	TRUE	FALSE
PABP_DROME	6.64527	6.98613	1.89391	0.972752	2	0.124875	0.124875	0.911151	FALSE	TRUE	FALSE
CUP_DROME	6.43426	11.1235	1.86164	1.45701	2	0.125874	0.125874	0.882207	FALSE	TRUE	FALSE
IF4A_DROME	5.75498	1.47224	1.75006	0.254445	2	0.163836	0.163836	0.782134	FALSE	TRUE	FALSE
P23128-2 DDX6_DROME (+1)	5.64604	0.896313	1.73095	0.158419	2	0.14985	0.14985	0.764993	FALSE	TRUE	FALSE
O76876_DROME (+1)	5.12053	5.93438	1.63326	1.05757	2	0.196803	0.196803	0.677365	FALSE	TRUE	FALSE
E1JJ68_DROME (+4)	4.74087	3.04621	1.55622	0.622268	2	0.196803	0.196803	0.608267	FALSE	TRUE	FALSE
Q95WY3_DROME	4.73852	2.79535	1.55573	0.574027	2	0.222777	0.222777	0.607824	FALSE	TRUE	FALSE
DX39B_DROME	4.69892	0.151608	1.54733	0.0322617	2	0.197802	0.197802	0.600296	FALSE	TRUE	FALSE
O62619-2 KPYK_DROME (+1)	4.52799	0.0911993	1.51028	0.0201405	2	0.223776	0.223776	0.567061	FALSE	TRUE	FALSE
DDX3_DROME	4.25103	0.0580384	1.44716	0.0136526	2	0.260739	0.260739	0.51045	FALSE	TRUE	FALSE
SMD2_DROME	4.13248	0.375786	1.41888	0.0908721	2	0.260739	0.260739	0.48508	FALSE	TRUE	FALSE
A1ZBL0_DROME (+1)	3.75332	0.363075	1.32264	0.0966591	2	0.315684	0.315684	0.398762	FALSE	TRUE	FALSE
Q9VM69_DROME	3.66952	0.710846	1.30006	0.193116	2	0.30969	0.30969	0.378509	FALSE	TRUE	FALSE
E1JGV6_DROME (+1)	3.64501	7.10397	1.29336	1.59127	2	0.300699	0.300699	0.372498	FALSE	TRUE	FALSE
Q9VHK1_DROME	3.52419	1.95401	1.25965	0.541153	2	0.314685	0.314685	0.342264	FALSE	TRUE	FALSE
VIT3_DROME	3.33857	1.04722	1.20554	0.311155	2	0.345654	0.345654	0.293733	FALSE	TRUE	FALSE
Q9VVI1_DROME	3.21713	1.34506	1.16849	0.412232	2	0.357642	0.357642	0.260498	FALSE	TRUE	FALSE
Q9W3B8_DROME	3.05093	0.212513	1.11545	0.069627	2	0.368631	0.368631	0.212922	FALSE	TRUE	FALSE
A4V3J9_DROME (+6)	3.0114	0.968099	1.1024	0.318772	2	0.355644	0.355644	0.201223	FALSE	TRUE	FALSE
Q9XZ21_DROME	2.87749	0.73612	1.05692	0.254445	2	0.425574	0.425574	0.160426	FALSE	TRUE	FALSE
Q9VAW1_DROME	2.87749	4.28703	1.05692	1.29923	2	0.417582	0.417582	0.160426	FALSE	TRUE	FALSE
Q9VYE9_DROME	2.80463	1.00682	1.03127	0.355239	2	0.418581	0.418581	0.137422	FALSE	TRUE	FALSE
SMD3_DROME	2.29544	4.33075	0.830925	1.55431	2	0.526474	0.526474	-0.0422754	FALSE	TRUE	FALSE
DDX41_DROME	2.26059	0.70894	0.815627	0.311093	2	0.533467	0.533467	-0.0559973	FALSE	TRUE	FALSE
RSMB_DROME	2.14667	0.803305	0.763917	0.369976	2	0.584416	0.584416	-0.102378	FALSE	TRUE	FALSE
Q0E8G6_DROME	1.9524	1.47069	0.669062	0.721556	2	0.57043	0.57043	-0.187457	FALSE	FALSE	FALSE
Q9Y091 FL2D_DROME	1.92856	0.0533379	0.656772	0.0276551	2	0.614386	0.614386	-0.19848	FALSE	FALSE	FALSE
KP58_DROME	1.75118	1.07658	0.560292	0.596892	2	0.665335	0.665335	-0.285016	FALSE	FALSE	FALSE
HSP7D_DROME	1.69922	0.334331	0.530172	0.196126	2	0.68032	0.68032	-0.312032	FALSE	FALSE	FALSE
Q7KMJ6_DROME	1.62105	0.214742	0.483075	0.132278	2	0.727273	0.727273	-0.354275	FALSE	FALSE	FALSE
VIR_DROME	1.59218	0.380687	0.465103	0.237973	2	0.729271	0.729271	-0.370394	FALSE	FALSE	FALSE
HSP7C_DROME	1.59059	0.638702	0.464106	0.396341	2	0.699301	0.699301	-0.371289	FALSE	FALSE	FALSE
U428_DROME	1.51657	0.91566	0.416451	0.586788	2	0.755245	0.755245	-0.414032	FALSE	FALSE	FALSE
CPSF6_DROME	1.45464	0.491143	0.37476	0.33451	2	0.775225	0.775225	-0.451426	FALSE	FALSE	FALSE
RL22_DROME	1.40277	0.827552	0.338449	0.574047	2	0.802198	0.802198	-0.483995	FALSE	FALSE	FALSE
Q9VMY3_DROME	1.35203	0.201886	0.301603	0.149045	2	0.8002	0.8002	-0.517043	FALSE	FALSE	FALSE
NH2L1_DROME	1.30564	1.00015	0.266693	0.732789	2	0.84016	0.84016	-0.548356	FALSE	FALSE	FALSE
Q9W1B9_DROME	1.29449	0.677174	0.258116	0.511871	2	0.828172	0.828172	-0.556049	FALSE	FALSE	FALSE
Q960E4_DROME	1.28129	0.39336	0.247865	0.304642	2	0.867133	0.867133	-0.565243	FALSE	FALSE	FALSE
RL371_DROME	1.25584	1.13823	0.227804	0.853575	2	0.852148	0.852148	-0.583237	FALSE	FALSE	FALSE
RS8_DROME	1.18988	0.569165	0.173853	0.469657	2	0.897103	0.897103	-0.631627	FALSE	FALSE	FALSE
GAR1_DROME	1.09679	0.288827	0.0923875	0.26184	2	0.938062	0.938062	-0.704697	FALSE	FALSE	FALSE
RL23_DROME	1.01995	0.679095	0.0197546	0.643387	2	0.985015	0.985015	-0.769844	FALSE	FALSE	FALSE
FBRL_DROME	0.985108	0.672654	-0.0150038	0.658742	2	0.993007	0.993007	-0.80102	FALSE	FALSE	FALSE
NHP2_DROME	0.928429	0.133184	-0.0742617	0.143206	2	0.948052	0.948052	-0.85417	FALSE	FALSE	FALSE
H9XVL9_DROME (+1)	0.815509	0.7754	-0.203942	0.890743	2	0.879121	0.879121	-0.970486	FALSE	FALSE	FALSE
Q9VWN4_DROME	0.808239	0.154067	-0.212898	0.190048	2	0.87013	0.87013	-0.978518	FALSE	FALSE	FALSE
Q9W0A8_DROME	0.799683	0.481188	-0.22354	0.584905	2	0.869131	0.869131	-0.988063	FALSE	FALSE	FALSE
RS2_DROME	0.771128	0.151159	-0.259901	0.195401	2	0.864136	0.864136	-1.02068	FALSE	FALSE	FALSE
RS23_DROME	0.719372	0.759958	-0.329377	0.976862	2	0.809191	0.809191	-1.08299	FALSE	FALSE	FALSE
RS14_DROME	0.678231	0.11637	-0.388268	0.17116	2	0.789211	0.789211	-1.13581	FALSE	FALSE	FALSE
RS11_DROME	0.649958	0.551773	-0.430847	0.80479	2	0.72028	0.72028	-1.174	FALSE	FALSE	FALSE
NOP10_DROME	0.649171	0.202562	-0.43206	0.309554	2	0.766234	0.766234	-1.17509	FALSE	FALSE	FALSE
RL27A_DROME	0.622995	0.572911	-0.473218	0.864711	2	0.75025	0.75025	-1.21201	FALSE	FALSE	FALSE
RL24_DROME	0.613483	0.580154	-0.488603	0.88647	2	0.692308	0.692308	-1.22581	FALSE	FALSE	FALSE
RL10_DROME	0.554247	0.0905486	-0.590145	0.163011	2	0.652348	0.652348	-1.31688	FALSE	FALSE	FALSE
EF1A1_DROME	0.499802	0.140761	-0.693542	0.279804	2	0.575425	0.575425	-1.40963	FALSE	TRUE	FALSE
RS4_DROME	0.453732	0.293627	-0.790249	0.626449	2	0.521479	0.521479	-1.49636	FALSE	TRUE	FALSE
RS25_DROME	0.444006	0.690521	-0.811917	1.3437	2	0.516484	0.516484	-1.5158	FALSE	TRUE	FALSE
ACT1_DROME	0.200712	1.08573	-1.60588	2.90109	2	0.193806	0.193806	-2.22794	FALSE	TRUE	FALSE

## Sheet: Hits
GFP-VasWT	GFP-VasDQAD
	Aub
	Piwi
	Armi
	FMR1
	Cactin
	Cup
	PyK
	Lig
	eIF-3pp66
	Pyd
	CG7564
	Doa
	Snama
	Moca-cyp
	SmD3
	Abs
SNRPG	SNRPG
Me31B	Me31B
eIF-4a	eIF-4a
betaTub56D	betaTub56D
Yp3	Yp3
Hel25E	Hel25E
SmE	SmE
Bel	Bel
PABP	PABP
SmD2	SmD2
Eip63E	Eip63E
Nop56	Nop56
snRNP-U1-70K	snRNP-U1-70K
Rm62	Rm62
Ssx	Ssx
Nop5	Nop5
SmB	SmB
Nop60B	Nop60B
CG12075	CG12075
TER94
CNBP
Rin
Capr
Tral
Yp2
eIF3ga
CG16865

## Sheet: GO Analysis
Category	Term	Description	Count	p-value	Benjamini adjust. p-value	Proteins
BP	GO:0000398	Splicing	15	1.00467e-14	2.44804e-12	Rm62, Moca-cyp, PABP, CG1622, CG7564, Hel25E, SNRPG, SmB, SmD2, SmD3 ,SmE ,Aub, Abs, Rin, snRNP-U1-70K
BP	GO:0048477	Oogensis	11	9.08589e-07	7.41987e-05	TER94, Cup, Aub, Piwi, FMR1, Me31B, eIF4A, Doa, SmD3, snRNP-U1-70K, Bel
BP	GO:0007279	Pole cell formation	7	5.97019e-08	7.31345e-06	TER94, Cup, Aub, Piwi, FMR1, Me31B, eIF4A
BP	GO:0048132	Female GSC assymetric division	6	4.00384e-06	0.000220174	Aub, Rm62, PABP, FMR1, eIF4A, Piwi
BP	GO:0016246	RNAi	6	4.06778e-06	0.000249121	Piwi, Armi, Aub, Bel, Rm62, FMR1
BP	GO:0007317	Regulation of oskar mRNA localization	6	7.3304e-05	0.000916049	Cup, TER94, Aub, Armi, SmB, SmD3
BP	GO:0006413	Translation initiation	4	0.000591584	0.0095931	eIF4A, eIF3ga, eIF-3p66, Bel
CC	GO:0036464	Cytoplasmic RNP granule	15	2.95231e-11	1.16906e-09	Aub, Armi, FMR1, Tral, Me31B, Lig, SNRPG, PABP, Cup, eIF4A, TER94, PyK, Bel, Yp3, Rm62
CC	GO:0071011	Spliceosome	14	6.12914e-09	4.78073e-07	Rm62, Moca-cyp, PABP, CG7564, CG1622, Hel25E, SNRPG, SmB, SmD2, SmD3, SmE, Aub, Rin, snRNP-U1-70K
CC	GO:0043186	P granule	10	1.52291e-05	0.00118717	Tral, TER94, eIF4A, SNRPG, PyK, Yp3, Armi, Aub, Bel, Me31B
CC	GO:0045495	pole plasm	5	0.000469547	0.00928982	SmB, SmD, Aub, Cup, TER94
CC	GO:0016442	RISC complex	2	0.00227404	0.0113239	FMR1, Bel
